1 **RESEARCH ARTICLE**

2  **$\alpha$ 1-COP delivers sphingolipid modifiers and controls plasmodesmal callose deposition in**  
3 **Arabidopsis**

4

5 Arya Bagus Boedi Iswanto<sup>1</sup>, Minh Huy Vu<sup>1</sup>, Ritesh Kumar<sup>1,5</sup>, Jong Cheol Shon<sup>2,4</sup>, Shuwei Wu<sup>1</sup>,  
6 Da-Ran Kim<sup>6</sup>, Kwak Yeon Sik<sup>6</sup>, Son Geon Hui<sup>1</sup>, Hobin Kang<sup>1</sup>, Woe Yoen Kim<sup>1</sup>, Sang Hee  
7 Kim<sup>1</sup>, Kwang Hyeon Liu<sup>2</sup>, Jae-Yean Kim<sup>1,3\*</sup>

8

9 <sup>1</sup>Division of Applied Life Science (BK21 FOUR Program), Plant Molecular Biology and  
10 Biotechnology Research Center, Gyeongsang National University, Jinju 660-701. Republic of  
11 Korea.

12 <sup>2</sup>College of Pharmacy and Research Institute of Pharmaceutical Sciences, Kyungpook National  
13 University, Daegu 702-701, Republic of Korea.

14 <sup>3</sup>Division of Life Science, Gyeongsang National University, 501 Jinju-daero, Jinju 52828,  
15 Republic of Korea.

16 <sup>4</sup>Departement of Environmental Toxicology Research Center, Korea Institute of Toxicology,  
17 Jinju 52834, Republic of Korea.

18 <sup>5</sup>Present address: Division of Plant Science, C.S. Bond Life Science Center, University of  
19 Missouri, Columbia, MO, 65201, USA.

20 <sup>6</sup>Departement of Plant Medicine, Gyeongsang National University, Republic of Korea

21

22 **\* Corresponding Authors: kimjy@gnu.ac.kr**

23

24 **Short title:** Coatomer protein function in sphingolipids-regulated callose deposition

25

26 **One-sentence summary:** Plant-specific coatomer protein functions as a negative regulator of  
27 callose accumulation by regulating the translocation of sphingolipid enzymes.

28

29

30

31

32 **Abstract**

33

34 Callose is a plant cell wall polymer in the form of  $\beta$ -1,3-glucan, which regulates symplasmic  
35 channel size at plasmodesmata (PD). It plays a crucial role in a variety of processes in plants  
36 through the regulation of intercellular symplasmic continuity. However, how to maintain callose  
37 homeostasis at PD in the molecular levels is poorly understood. To further elucidate the  
38 mechanism of PD callose homeostasis, we screened and identified an Arabidopsis mutant plant  
39 that exhibited excessive callose deposition at PD. Based on the Next-generation sequencing  
40 (NGS)-based mapping, other mutant allele analysis, and complementation assay, the mutated  
41 gene was shown to be  *$\alpha$ 1-COP*, which encodes a member of the COPI coatomer complex  
42 comprised of  $\alpha$ ,  $\beta$ ,  $\beta'$ ,  $\gamma$ ,  $\delta$ ,  $\epsilon$ , and  $\zeta$  subunits. Since there is no report on the link between COPI  
43 and callose/PD, it was extremely curious to know the roles of  *$\alpha$ 1-COP* or COPI in PD regulation  
44 through callose deposition. Here, we report that loss-of-function of  *$\alpha$ 1-COP* directly elevates  
45 the callose accumulation at PD by affecting subcellular protein localization of callose  
46 degradation enzyme PdBG2. This process is linked to ERH1, an inositol phosphoryl ceramide  
47 synthase (IPCS), and glucosylceramide synthase (GCS) functions through physical interactions  
48 with the  $\alpha$ 1-COP protein. In addition, the loss-of-function of  *$\alpha$ 1-COP* also alters the subcellular  
49 localization of ERH1 and GCS proteins, results in a reduction of GlcCers and GlhCers  
50 molecules, which are the key SL species for lipid raft formation. According to our findings, we  
51 propose that  $\alpha$ 1-COP protein, together with the SL modifiers controlling lipid raft compositions,  
52 regulates the function of GPI-anchored PD proteins and hence the callose turnover at PD and  
53 symplastic movement of biomolecules. Our findings provide the first key clue to link the COPI-  
54 mediated intracellular trafficking pathway to the callose-mediated intercellular signaling  
55 pathway through PD.

56

57

58

59 **Keywords:** callose, plasmodesmata, sphingolipid, coatomer, membrane-bound vesicle.

## 60 **Introduction**

61 One of the crucial components in the plant cell is callose, a polysaccharide in the form  
62 of  $\beta$ -1,3 glucan located at the cell walls. Callose plays a vital role in controlling the symplasmic  
63 permeability of plasmodesmata (PD) and regulates the cell-to-cell movement of signaling  
64 molecules. The callose deposition at the neck region of PD controls the symplasmic continuity.  
65 Callose is mainly synthesized by callose synthases/glucan synthase-like(s) (CalSs/GSLs) and  
66 antagonistically degraded by  $\beta$ -1,3-glucanases as callose degradation enzymes (BGs) (Verma  
67 and Hong, 2001; Jacobs et al., 2003; Levy et al., 2007; Barratt et al., 2011; Lee and Lu, 2011;  
68 Vaten et al., 2011; De Storme and Geelen, 2014; Iswanto and Kim, 2017; Gaudioso-Pedraza et  
69 al., 2018; Wu et al., 2018).

70 PD, the sophisticated symplasmic apertures, are versatile. These intracellular channels  
71 play critical roles in numerous multicellular events during plant development by conferring the  
72 molecular exchange of transcription factors, RNAs, and plant growth regulators (Zambryski  
73 and Crawford, 2000; Maule, 2008). Previous studies have described that the plasmodesmal  
74 plasma membrane (PD-PM) is distinct from common cellular PM in terms of condensed sterols  
75 and sphingolipid (SL) molecules (Grison et al., 2015; Iswanto and Kim, 2017). The enrichment  
76 of sterols and SL molecules at PM and PD-PM is often known as the membrane microdomains  
77 or lipid raft compartments (Mongrand et al., 2004; Grennan, 2007; Mongrand et al., 2010;  
78 Tapken and Murphy, 2015; Iswanto and Kim, 2017). Glycosyl inositol phosphoryl ceramide  
79 (GIPCs) and glucosyl ceramides (GlcCers) are the most abundant SL molecules found in the  
80 PM of the plant cell. Up to 64% of total sphingolipids are GIPCs, and ~25% of the PM lipids  
81 in the *Arabidopsis thaliana* leaf are GIPCs molecules (Markham and Jaworski, 2007; Fang et  
82 al., 2016). Several studies have described the roles of lipid rafts in PD regulation, especially by  
83 regulating the subcellular localization of GPI-anchored PD proteins (Bayer et al., 2014; Grison  
84 et al., 2015; Nicolas et al., 2017; Iswanto et al., 2020).

85 Coat protein I (COPI) is a coatomer, a transport vesicle-bound protein complex that is  
86 responsible for various actions and several distinct secretory pathways, including ER-Golgi  
87 anterograde transport, Golgi-ER retrograde transport, intra-Golgi cargo machinery of numerous  
88 proteins and maintenance of Golgi function and structural integrity (Pepperkok et al., 1993;  
89 Gaynor et al., 1998; Schroder-Kohne et al., 1998; Paul and Frigerio, 2007; Wang et al., 2010;  
90 Ahn et al., 2015). COPI is formed of seven subunits ( $\alpha/\beta/\beta'/\gamma/\delta/\epsilon/\zeta$ ) which are further grouped

91 into two subcomplexes, the B-subcomplex ( $\alpha/\beta'/\epsilon$ ) and F-subcomplex ( $\beta/\gamma/\delta/\zeta$ ) (Jackson, 2014).  
92 In contrast to mammals and yeast studies, there are several isoforms of all the coatomer subunits  
93 have been identified in Arabidopsis, except  $\gamma$ -COP and  $\delta$ -COP that contains only one isoform  
94 (Donohoe et al., 2007; Gao et al., 2014; Ahn et al., 2015; Woo et al., 2015). A previous study  
95 revealed that disruption of  $\epsilon$ -COP subunit isoforms impairs the Golgi apparatus integrity and  
96 changes the localization of endomembrane proteins (EMPs) (Woo et al., 2015). The action of  
97 COPI within intracellular trafficking is tightly connected to the cargo molecules containing the  
98 dilysine KKXX and KXXKXX motifs presented on their C-terminal tail (Schroder-Kohne et al.,  
99 1998; Eugster et al., 2004; Jackson et al., 2012; Ma and Goldberg, 2013). Also, the recent study  
100 of Arabidopsis  $\alpha$ -COP reveals that  $\alpha 2$ -COP is essential for plant growth and development by  
101 maintaining the morphology of the Golgi apparatus through the subcellular localization of a  
102 protein harboring dilysine motif, p24 $\delta 5$  (Gimeno-Ferrer et al., 2017).

103 Previously, we generated dexamethasone inducible *RNAi* line of *Glucan synthase-like*  
104 *8* (*dsGSL8 RNAi*), which is defective in tropism due to the absence of GSL8-induced callose  
105 deposition (Han et al., 2014). In this study, EMS mutagenesis of *dsGSL8 RNAi* resulted in a  
106 mutant that rescued the tropic responses and showed a high PD callose phenotype in  
107 Arabidopsis hypocotyls. In this mutant line, the NGS-based mapping (NGM) revealed a point  
108 mutation in the AT1G62020 ( $\alpha 1$ -COP) with single amino acid substitution. We also found that  
109 other T-DNA inserted  $\alpha 1$ -COP mutants exhibited excessive callose phenotype. Moreover, in  
110 the  $\alpha 1$ -cop mutant, the subcellular localization of ERH1 and GCS, which are two SL pathway  
111 enzymes with dilysine motif, were mislocalized. We also found that the localization of PdBG2,  
112 one of the callose degrading GPI-anchored enzymes, was also altered in the  $\alpha 1$ -cop mutant.  
113 Here, we provide evidence for the novel function of  $\alpha 1$ -COP in regulating PD callose deposition  
114 through SL modifiers cargo machinery.

## 115 **Results**

### 116 **Loss-of-function of *α1-COP* exhibits excessive callose accumulation.**

117 We treated tropism defective *dsGSL8 RNAi* plants (Han et al., 2014) with ethyl  
118 methanesulfonate (EMS), strikingly we found several *dsGSL8 RNAi*-EMS lines displayed  
119 rescued tropism responses (data not shown). Furthermore, we selected one mutant line for  
120 subsequent analyses. NGM result predicted the point mutation in the AT1G62020 (*α1-COP*),  
121 with a single amino acid substitution, *α1-cop-4* (G486D substitution) (**Supplemental Figure**  
122 **1A, Figure 1A, B**). For further study, we characterized two more mutants of *α1-COP*, *α1-cop-*  
123 *1* (SALK\_078465) and *α1-cop-5* (SALK\_003425), which have the T-DNA insertion at different  
124 positions of the gene and shows different transcript abundance (**Figure 1C, D**). Phototropic  
125 response by Arabidopsis hypocotyl is associated with callose dependent modulation of PD  
126 permeability (Han et al., 2014). Hence, we conducted a PD permeability assessment using the  
127 HPTS movement assay for these mutants. The HPTS movement analysis was conducted at 3-  
128 day-etiolated seedlings of wild-type Col-0 and *α1-cop* mutant plants. Interestingly, three  
129 independent alleles of *α1-cop* mutants show reduced HPTS diffusions in comparison to wild-  
130 type Col-0 (**Supplemental Figure 1B, C**). To test whether this PD permeability alteration is  
131 linked to the callose accumulation or not, aniline blue staining was done to check the callose  
132 level in etiolated seedlings and rosette leaves of Arabidopsis wild-type Col-0 and *α1-cop* mutant  
133 plants. Interestingly, *α1-cop* mutant plants shown elevated callose levels in both hypocotyl and  
134 Arabidopsis rosette leaves (**Figure 1E, F, G, H**).

135 We also generated transgenic plants overexpressing *α1-COP* (*p35S::α1-COP*) in the  
136 wild-type Col-0 background. *α1-COP*-OE#2 and *α1-COP*-OE#3 were selected (**Supplemental**  
137 **Figure 2A**) and subsequently tested for PD permeability analysis. *α1-COP* overexpression  
138 plants exhibited more substantial HPTS diffusion and less callose accumulation as compared  
139 with wild-type Col-0 (**Supplemental Figure 2B-E**). We also checked the phototropism  
140 phenotype from *α1-cop* mutants and *α1-COP* overexpression plants. Consistent with our initial  
141 mutant screening, three independent mutant alleles of *α1-COP* showed faster phototropism and  
142 increased curvature angle. Conversely, the hypocotyl curvature angle was attenuated in the *α1-*  
143 *COP* overexpression plant in comparison to the wild-type Col-0 and *GSL8* overexpression  
144 plants (**Supplemental Figure 1D, E**). In Arabidopsis, there are two isoforms of  $\alpha$ -COP  
145 proteins, and it had been reported that  $\alpha2$ -COP protein is critical for plant growth and

146 development by regulating the secretory pathway of p24 $\delta$ 5 protein as well as maintaining the  
147 morphology of Golgi apparatus (Gimeno-Ferrer et al., 2017). Next, to anticipate any role of  $\alpha$ 2-  
148 *COP* in controlling the callose-mediated PD permeability, the callose staining assay was done  
149 to determine the callose level in hypocotyls of  $\alpha$ 2-*cop* mutants. Surprisingly, two independent  
150  $\alpha$ 2-*cop* mutant alleles and wild-type Col-0 hypocotyls showed a similar level of callose  
151 deposition (**Supplemental Figure 3A-C**), and the phototropism was comparable to wild-type  
152 Col-0 plants (**Supplemental Figure 3D, E**), indicating that  $\alpha$ 2-*COP* is not involved in the  
153 callose-induced phototropism. In short, our results suggest that  $\alpha$ 1-*COP* functions specifically  
154 to increase PD permeability by decreasing callose accumulation in Arabidopsis.

155

### 156 **$\alpha$ 1-COP is a *trans*-Golgi-localized protein, but partially localized at PD.**

157  $\alpha$ 1-COP is a member of COPI that facilitate retrieval/retrograde transport of numerous  
158 proteins from Golgi to endoplasmic reticulum (ER), and for intra-Golgi delivery (Paul and  
159 Frigerio, 2007; Ahn et al., 2015). Therefore, to determine if in plants also  $\alpha$ 1-COP localized at  
160 Golgi compartment,  $\alpha$ 1-COP fusion proteins with GFP/RFP-tag at either N-terminal or C-  
161 terminal positions were generated and transiently expressed in *Nicotiana benthamiana*  
162 epidermal cells (**Figure 2A**). All the configurations and tags showed a similar fluorescent  
163 pattern (**Figure 2A**). Next, we expressed well-known *trans*-Golgi protein, ERH1 (Wang et al.,  
164 2008), along with  $\alpha$ 1-COP, and found  $\alpha$ 1-COP was highly co-localized with ERH1 (**Figure**  
165 **2B**). Moreover, these signals also showed PD-like punctate fluorescent signals at the cell  
166 periphery. To further verify the PD localization, we examined the co-localization of  $\alpha$ 1-COP  
167 and aniline blue-stained PD callose. Aniline blue is a widely used PD marker that stains callose  
168 localized at the PD neck (Vaten et al., 2011). The transiently expressed  $\alpha$ 1-COP signals partially  
169 co-localized with aniline blue at PD in *N. benthamiana* (**Figure 2C**). The Arabidopsis  
170 transgenic plant overexpressing  $\alpha$ 1-COP (p35S::*GFP*: $\alpha$ 1-COP) were generated in the wild-type  
171 Col-0 background to determine the subcellular localization of  $\alpha$ 1-COP. Consistent with  
172 transient expression data, stable *GFP*: $\alpha$ 1-COP and aniline blue signals were partially co-  
173 localized at PD (**Figure 2D**). Together with the colocalization data with the other PD marker,  
174 PDLP5, PDLP1 and PdBG2 (shown in **Figure 3C, Figures 10A, C**), these results suggest that  
175  $\alpha$ 1-COP is a *trans*-Golgi-localized protein that also partially located at PD.

176

177  **$\alpha$ 1-COP interacts with sphingolipid modifiers ERH1 and GCS.**

178 To examine the role of the  $\alpha$ 1-COP protein in the formation of a heptameric protein  
179 complex coatomer on vesicles, we first used bimolecular complementation (BiFC) to confirm  
180 the interactions of the coatomer complex components *in planta*.  $\beta$ '2-COP and  $\epsilon$ 1-COP were  
181 selected from the B-subcomplex members, and  $\delta$ -COP was preferred from the F-subcomplex  
182 members. BiFC analysis clearly showed the  $\alpha$ 1-COP interaction with  $\epsilon$ 1-COP,  $\beta$ '2-COP, and  
183  $\delta$ -COP (**Supplemental Figure 4**). The primary function of COPI vesicles is to transport  
184 proteins and lipids back to the previous compartment along the secretory pathway. Furthermore,  
185 transmembrane proteins containing a KKXX or a KXKXX motif on their C-terminal tail are  
186 COPI dependent cargo machinery, which is retrieved from the Golgi apparatus to the ER  
187 (Spang, 2013). Several studies in mammals shown that the COPI specifically interacts with SL  
188 species (Chaudhary et al., 1998; Contreras et al., 2012). In Arabidopsis, several well-known SL  
189 enzymes such as LONGEVITY ASSURANCE GENE ONE HOMOLOGs (LOHs), ERH1, and  
190 GCS (Wang et al., 2008; Msanne et al., 2015; Xie et al., 2015; Iswanto et al., 2020) have been  
191 reported.

192 To determine if  $\alpha$ 1-COP also interacts with SL enzymes *in planta*, Arabidopsis SL  
193 enzymes were analyzed for the presence of dilysine motif at their C-terminal domain. Detail  
194 analysis showed that most of the SL pathway enzymes in Arabidopsis have dilysine motifs, and  
195 subsequently, we selected two prominent SL enzymes ERH1 and GCS for further study  
196 (**Supplemental Figure 5A**). To examine the function of  $\alpha$ 1-COP at ERH1 and GCS cargo  
197 molecules, BiFC assay was performed. The BiFC assay showed that  $\alpha$ 1-COP interacts with  
198 ERH1 and GCS (**Figure 3A**). We further confirmed these interactions using co-  
199 immunoprecipitation (Co-IP) analyses. GFP: $\alpha$ 1-COP with or without Myc:ERH1/Myc:GCS  
200 was transiently expressed in *N. benthamiana* leaves. Co-IP followed by immunoblot analyses  
201 exhibited that  $\alpha$ 1-COP interacts with ERH1 and GCS (**Figure 3B**). The fluorescent signals from  
202 the both BiFC assay using  $\alpha$ 1-COP and ERH1/GCS were detected at the entire cell periphery  
203 along with some PD-like punctate spots. Further, we validated the PD localization by transiently  
204 expressing two sets of BiFC constructs in *N. benthamiana*; (ERH1:nVenus and  $\alpha$ 1-  
205 COP:cVenus, GCS:nVenus and  $\alpha$ 1-COP:cVenus) along with PLASMODESMATA-  
206 LOCATED PROTEIN 5 (PDLP5:RFP) (Thomas et al., 2008). Interestingly, GFP punctate spots  
207 on the cell periphery showed perfect co-localization with PDLP5:RFP indicating PD

208 localization of  $\alpha 1$ -COP interactions (**Figure 3C**). These results confirm that  $\alpha 1$ -COP interacts  
209 with SL enzymes, ERH1, and GCS at the cell periphery along with PD.

210

### 211 **Single amino acid substitution of $\alpha 1$ -COP affects its interaction with ERH1 and GCS.**

212 In yeast, a single amino substitution at N-terminal domain of  $\alpha 1$ -COP have shown  
213 several defective phenotypes in the intracellular transports of dilysine cargo molecules  
214 (Schroder-Kohne et al., 1998; Eugster et al., 2000; Kim et al., 2011). Next, to determine the  
215 effect of the  $\alpha 1$ -COP<sup>G486D</sup> single amino substitution mutant at ERH1 and GCS interactions,  
216 EMS mutated  $\alpha 1$ -COP<sup>G486D</sup> was amplified and cloned. Firstly, the mutant version of  $\alpha 1$ -COP  
217 was fused to GFP (p35S::GFP: $\alpha 1$ -COP<sup>G486D</sup>) (**Supplemental Figure 5B**) to check the  
218 subcellular localization. The GFP: $\alpha 1$ -COP<sup>G486D</sup> and  $\alpha 1$ -COP:RFP were transiently co-  
219 expressed in *N. benthamiana*. Confocal images showed that  $\alpha 1$ -COP<sup>G486D</sup> was highly co-  
220 localized with wild type  $\alpha 1$ -COP (**Supplemental Figure 5C**). This result indicates that a single  
221 amino substitution (G486D) at N-terminal of  $\alpha 1$ -COP does not change its subcellular  
222 localization.

223 Next, BiFC assay was performed to analyze the effect of single amino substitution on  
224 the  $\alpha 1$ -COP<sup>G486D</sup> interactions with ERH1 and GCS. Two sets of constructs (ERH1:nVenus and  
225  $\alpha 1$ -COP<sup>G486D</sup>:cVenus, GCS:nVenus and  $\alpha 1$ -COP<sup>G486D</sup>:cVenus) were transiently expressed in *N.*  
226 *benthamiana* leaves separately. Surprisingly, no interactions with ERH1 or GCS were observed  
227 by BiFC (**Figure 3A**). We further validated the BiFC data using Co-IP assay. GFP: $\alpha 1$ -COP<sup>G486D</sup>  
228 with or without Myc:ERH1/Myc:GCS were transiently expressed in *N. benthamiana* leaves.  
229 Co-IP followed by immunoblot analyses showed that  $\alpha 1$ -COP does not interact with ERH1 and  
230 GCS (**Figure 3B**). The BiFC data agree with Co-IP data, validating that  $\alpha 1$ -COP<sup>G486D</sup> does not  
231 interact with ERH1 and GCS. Together, these data suggest that glycine residue at 486 aa in  $\alpha 1$ -  
232 COP plays a critical role in maintaining the physical interactions with ERH1 and GCS SL  
233 pathway enzymes. However, this mutation does not affect the subcellular localization of  $\alpha 1$ -  
234 COP.

235

### 236 **Loss of function of $\alpha 1$ -COP alters the subcellular localization of ERH1 and GCS**

237 Previously it was reported that the reduction in the COPI complex had favored the  
238 mislocalization of cholesterol, sphingolipids, Rac1, and Cdc42 away from the plasma



239 membrane into the cytoplasmic compartment in the animal system (Misselwitz et al., 2011).  
240 Similarly, the cellular localization of AtERH1 in the absence of  $\alpha 1$ -COP was tested. As  $\alpha 1$ -  
241 COP, partially localized at PD, there may be a probability that its interacting SL modifier ERH1  
242 also confines to similar cellular loci. To check this possibility ERH1:GFP and PDL5:RFP  
243 were transiently co-expressed in *N. benthamiana*. Similar to  $\alpha 1$ -COP, ERH1:GFP fluorescent  
244 signal was partially co-localized with PDL5:RFP signals at PD (**Figure 4A**). Also, the stable  
245 transgenic plants overexpressing ERH1:GFP in the wild-type Col-0 and  *$\alpha 1$ -cop-5* plants were  
246 generated. Consistent with transient expression, wild-type Col-0 plants overexpressing  
247 ERH1:GFP showed PD-like peripheral punctate spots (**Figure 4B-D, Supplemental Figure**  
248 **6A**), but surprisingly ERH1 was mislocalized in the absence of  $\alpha 1$ -COP protein, it lacked the  
249 PD-like punctate spots and was mainly accumulated in the cytoplasm (**Figure 4E,**  
250 **Supplemental Figure 6B**). Also, peripheral punctate spots shown by ERH1:GFP in the wild-  
251 type Col-0 plants were strongly co-localized with aniline blue signals at PD (**Figure 4F**), which  
252 further validated the PD localization of ERH1. In contrast, cytoplasmic ERH1:GFP signals in  
253 the  *$\alpha 1$ -cop-5* plant did not co-localize with aniline blue at PD (**Figure 4G**). Furthermore, to  
254 investigate the roles of  $\alpha 1$ -COP and ERH1 in intracellular trafficking, we used Brefeldin A  
255 (BFA) which is known to block protein transport between the endoplasmic reticulum (ER) and  
256 the Golgi apparatus (Geng et al., 2015). Previously, in the absence of BFA, GFP signals of  $\alpha 1$ -  
257 COP (**Figure 2C**) and ERH1 (**Figure 4A**) showed PD punctate spots. However, *N.*  
258 *benthamiana* leaves transiently expressing GFP: $\alpha 1$ -COP or ERH1:GFP infiltrated with BFA (6  
259 h before observation) resulted in the accumulation of massive fluorescent aggregates at  
260 cytoplasm (**Supplemental Figure 7**). These results indicate that  $\alpha 1$ -COP and ERH1 are  
261 involved in intracellular trafficking, and the absence of  $\alpha 1$ -COP interferes subcellular  
262 localization of ERH1.

263 GCS plays a vital role in plant growth and development. Previous studies showed that  
264 GCS is localized at the ER compartment (Melser et al., 2010; Msanne et al., 2015). Consistent  
265 with previous findings, GCS:GFP was highly co-localized with ER retention signal HDEL:RFP  
266 (**Figure 5A**), along with some PD-like punctate spots at the cell periphery (**Figure 5A**). To  
267 check whether GCS and ERH1 share the typical subcellular localization, ERH1:GFP and  
268 GCS:RFP were transiently co-expressed in *N. benthamiana* and noticeably GCS:RFP was  
269 partially co-localized with ERH1:GFP (**Figure 5B**). To verify PD-like peripheral punctate spots

270 showed by GCS:GFP are located at PD, transiently expressed GCS:GFP tobacco leaves were  
271 stained with aniline blue. GCS:GFP exhibited a good co-localization with aniline blue-stained  
272 callose at PD (**Figure 5C-D**). To validate that GCS is partially localized at PD, transgenic plants  
273 overexpressing GCS:GFP were generated. Consistent with transient expression, GCS:GFP in  
274 the wild-type Col-0 background showed partial co-localization with aniline blue signals at PD  
275 (**Figure 5E**). However, in the absence of  $\alpha 1$ -COP protein, GCS was mainly localized at  
276 cytoplasm and did not co-localize with PD callose (**Figure 5F**). Taken together, these results  
277 suggest that  $\alpha 1$ -COP protein directly or indirectly modulates the subcellular localization of  
278 ERH1 and GCS SL modifiers in Arabidopsis.

279

### 280 ***$\alpha 1$ -COP is involved in the sphingolipid biosynthesis pathway***

281 Since ERH1 and GCS interacted with  $\alpha 1$ -COP, and loss of function of  *$\alpha 1$ -COP* altered  
282 their subcellular localizations, we hypothesized that SL compositions are associated with  $\alpha 1$ -  
283 COP function. To experimentally test the hypothesis, firstly, the transcript level of *ERH1* and  
284 *GCS*, along with several genes involved in the SL pathway was analyzed. In the absence of  *$\alpha 1$ -*  
285 *COP*, transcript levels of *ERH1* and *GCS* were similar to that of wild-type Col-0 plants. In  
286 contrast, plants overexpressing  *$\alpha 1$ -COP*, strongly induced the expression level of several SL  
287 pathway genes as compared to wild-type Col-0 plants (**Supplemental Figure 8**). Next, the SL  
288 molecules reported in plants such as LCBs, ceramides, hydroxyceramides, GlcCers, GlcHCers  
289 and GIPCs (Markham et al., 2006; Magnin-Robert et al., 2015; Ali et al., 2018; Yan et al., 2019;  
290 Iswanto et al., 2020) were analyzed from wild-type Col-0,  *$\alpha 1$ -cop-1*,  *$\alpha 1$ -cop-5*,  $\alpha 1$ -COP-OE#1  
291 and  $\alpha 1$ -COP-OE#2 overexpression plants. The SL profiling exhibited significant alterations in  
292 the ceramides, GlcCers, and GlcHCers levels as compared to wild-type Col-0 (**Figure 6**). Loss  
293 of function of  *$\alpha 1$ -COP* showed a significant reduction in the total ceramides, GlcCers, and  
294 GlcHCers contents, conversely  $\alpha 1$ -COP overexpression plants displayed significant elevation  
295 in the several molecules of GlcCers (**Figure 6**). Overall, these results indicate that  *$\alpha 1$ -COP* is  
296 mainly involved in the GlcCers and GlcHCers homeostasis maintenance presumably through  
297 intracellular regulation of SLs modifiers in Arabidopsis.

298

### 299 **Loss of function of *$\alpha 1$ -COP* changes the subcellular localization of PdBG2**

300 As the loss of function of the *α1-COP* mutant showed enhanced PD callose phenotype,  
301 a question arises whether the subcellular localization of GPI-anchored proteins was perturbed  
302 in the *α1-cop* mutants. Previous studies have remarkably identified the effect of sterols along  
303 with SL alteration in the functions of GPI-anchored PD proteins, PdBG2 and PDCB1  
304 (Farquharson, 2015; Grison et al., 2015; Iswanto and Kim, 2017; Iswanto et al., 2020). PdBGs  
305 belong to the group of GPI-anchored PD proteins, which are highly linked to sterol and SL-  
306 enriched lipid raft in *planta*. In Arabidopsis, two PdBGs (PdBG1 and PdBG2) have been well  
307 studied, which are known to degrade callose deposition at the neck region of PD (Zavaliev et  
308 al., 2011; Benitez-Alfonso et al., 2013; Zavaliev et al., 2013; Zavaliev et al., 2016; Yeats et al.,  
309 2018). Firstly, transgenic plants overexpressing GFP:PdBG2 in the wild-type Col-0 and *α1-*  
310 *cop-5* plants were generated. Furthermore, the subcellular localization of PdBG2 in the  
311 Arabidopsis cotyledons and hypocotyls was analyzed in the mutant and wild-type Col-0  
312 backgrounds. Consistent with previous reports (Iswanto et al., 2020), GFP:PdBG2 was  
313 localized at PD in the wild-type Col-0 background (**Figure 7A, C**). In contrast, in *α1-cop-5*,  
314 GFP:PdBG2 failed to accumulate at PD (**Figure 7B, D**). To confirm the mislocalization of  
315 PdBG2 in the *α1-cop-5* mutant, the cotyledons were stained with aniline blue before imaging.  
316 As expected, the observed GFP fluorescence in wild-type Col-0 plants showed perfect co-  
317 localization with PD callose, whereas GFP fluorescence depicted in the *α1-cop-5* did not co-  
318 localize with PD callose (**Figure 7A, B**). The PdBG2 localization was also analyzed in  
319 Arabidopsis hypocotyls. A similar mislocalization event was observed in hypocotyl when *α1-*  
320 *COP* was absent (**Figure 7C, D**). A recent study has shown that lipid raft compositions are  
321 critical for the secretory movement of GPI-anchored PdBG2 to PD (Iswanto et al., 2020).

322 Next, the question arises whether  $\alpha 1$ -COP also plays a critical role in the translocation  
323 of non-GPI-anchored PD proteins. To answer the above question, the subcellular localization  
324 of PDLP1 and PDLP2 proteins in the absence of *α1-COP* was determined. Interestingly,  
325 subcellular localization of PDLPs proteins was not changed in the absence of *α1-COP*  
326 (**Supplemental Figure 9**), indicating that  $\alpha 1$ -COP is not involved in the secretory cargo  
327 machinery of non-GPI-anchored PDLP1 or PDLP2 proteins. These data suggest that *α1-COP*  
328 is required for the recruitment of PdBG2 to PD. Moreover, the mislocalization of PdBG2 in the  
329 absence of  $\alpha 1$ -COP protein potentially led to the enhanced callose phenotype. An increase in  
330 callose level in the *α1-cop* mutants is not due to the decreased transcript of known PD specific

331 callose degrading enzymes, namely, *BG\_ppap*, *PdBG1*, *PdBG2*, and *PdBG3* (**Supplemental**  
332 **Figure 10**). Taken together, current findings suggest that the  $\alpha$ 1-COP modulates the PD callose  
333 by regulating the secretion of PdBG2 to PD.

334

### 335 ***ERH1* and *GCS*-mediated PD callose regulation requires $\alpha$ 1-COP**

336 To gain further insight into the functions of  $\alpha$ 1-COP, *ERH1*, and *GCS* in callose-  
337 regulated symplastic continuity, PD callose was analyzed in plants overexpressing ERH1 and  
338 GCS, respectively. Interestingly, *ERH1* and *GCS* overexpression plants showed a significant  
339 reduction of callose depositions as compared with wild-type Col-0 (**Figure 8D-E**).  
340 Furthermore, callose level in *erh1-1* (SALK\_206784) and *gcs-2* mutants (Iswanto et al., 2020)  
341 was also quantified. (**Figure 8A-C**). The callose level was significantly high in the *gcs-2*  
342 mutant, but the loss of function of *ERH1* did not show a significant difference in PD callose as  
343 compared to wild type (**Figure 8D-E**). This presumably reflects functional redundancy of the  
344 two homologs of *ERH1* found in Arabidopsis genome, AT2G29525 *ERH1-like1* (*ERHL1*) and  
345 AT3G54020 (*ERHL2*) (Wang et al., 2008).

346 Since, the proper localizations of ERH1 and GCS require the biological function of  $\alpha$ 1-  
347 COP in Arabidopsis. We first asked if an attenuation in callose deposition actually requires the  
348 action of a  $\alpha$ 1-COP protein. For this study, crosses were made between *al-cop-5* and Col-  
349 0/p35S::ERH1:GFP as well as *al-cop-5* and Col-0/p35S::GCS:GFP. Homozygous F3  
350 population from each genotypes were then examined for callose deposition analysis.  
351 Surprisingly, both *al-cop-5*/p35S::ERH1:GFP and *al-cop-5*/p35S::GCS:GFP plants showed  
352 significant increase in callose depositions in comparison to wild-type Col-0, *ERH1* and *GCS*  
353 overexpression plants. However, there were no significance differences in the observed callose  
354 depositions from *al-cop-5*, *gcs-2*, *al-cop-5*/p35S::ERH1:GFP and *al-cop-5*/p35S::GCS:GFP  
355 plants (**Figure 8D-E**). Collectively, these data suggest that  $\alpha$ 1-COP is essential for ERH1 and  
356 GCS functions in regulating callose deposition at PD.

357

### 358 ***ERH1* and PdBG2 are the cargo proteins of $\alpha$ 1-COP**

359 In plants, lipid raft-enriched vesicle is required for GPI-anchored PdBG2 translocation  
360 (Iswanto et al., 2020). The secretory pathway of GPI-anchored PdBG2 and non GPI-anchored  
361 PDLP1 protein are segregated from ER to Golgi which explicate that there are at least two

362 cargo machineries in the early secretory pathway, lipid raft and non lipid raft dependent  
363 manners (Iswanto and Kim, 2017; Iswanto et al., 2020). Moreover, non GPI-anchored PDLP1  
364 protein interacts with  $\alpha 2$ -COP protein, not  $\alpha 1$ -COP protein (Caillaud et al., 2014) which is  
365 indicating that  $\alpha 2$ -COP protein may be involved in the secretory pathway of non GPI-anchored  
366 PD protein, especially for PDLP1. Since  $\alpha 1$ -COP function is required for cellular localization  
367 of ERH1, GCS and PdBG2, thus we hypothesized that  $\alpha 1$ -COP is presumably associated  
368 with GPI-anchored PD proteins within intracellular compartment. To test the hypothesis, we  
369 examined if  $\alpha 1$ -COP is enriched by ERH1, then different combination of ERH1:GFP,  $\alpha 1$ -COP-  
370 RFP and VAMP721-RFP (vesicle marker) were transiently expressed in the *N. benthamiana*  
371 leaves with or without Exo1, an ER to Golgi intracellular trafficking blocker (Iswanto et al.,  
372 2020). Confocal imaging showed that when GFP: $\alpha 1$ -COP was co-expressed together with  
373 VAMP721-RFP in the absence of Exo1, the fluorescent signals were partially co-localized at  
374 cell periphery (**Figure 9A**), whereas in the presence of Exo1, the fluorescent signals were highly  
375 co-localized in the cytoplasm (**Figure 9B**). Similarly, when ERH1:GFP was co-expressed  
376 together with VAMP721-RFP in the absence or presence of Exo1, the fluorescent signals were  
377 co-localized in the cell periphery or cytoplasm, respectively (**Figure 9C, D**). Co-localization  
378 fluorescent signals were also observed when ERH1:GFP and  $\alpha 1$ -COP:RFP were co-expressed  
379 together with or without Exo1 (**Figure 9E, F**), whereas the fluorescent signals depicted from  
380 ERH1:GFP and  $\alpha 2$ -COP:RFP localization after Exo1 treatment did not show co-localization  
381 (**Supplemental Figure 11**). Together, these results agree with BiFC and Co-IP results,  
382 validating that  $\alpha 1$ -COP physically interacts with ERH1 and specifically serves the cargo  
383 machinery of SL modifier ERH1.

384 We next performed same experiments to determine whether PdBG2 is also the cargo  
385 protein for  $\alpha 1$ -COP. We co-expressed GFP:PdBG2 and  $\alpha 1$ -COP:RFP or PDLP1:GFP and  $\alpha 1$ -  
386 COP:RFP in the *N. benthamiana* leaves with or without Exo1. Confocal imaging exhibited that  
387 when GFP:PdBG2 or PDLP1:GFP was transiently co-expressed together with  $\alpha 1$ -COP:RFP in  
388 the absence of Exo1, the fluorescent signals were strongly co-localized at PD (**Figure 10A, C**).  
389 Interestingly, the fluorescent signals depicted from GFP:PdBG2 and  $\alpha 1$ -COP:RFP were also  
390 co-localized at cytoplasm after Exo1 treatment, whereas PDLP:GFP signals were segregated  
391 from  $\alpha 1$ -COP:RFP signals in the presence of Exo1, not for GFP:PdBG2 (**Figure 10B, D**). These  
392 results prompted us to deeply investigate the role of  $\alpha 1$ -COP or  $\alpha 2$ -COP in the protein cargo

393 machinery of GPI-anchored PD protein and non GPI-anchored PD protein. We next co-expressed  
394 GFP:PdBG2 and  $\alpha 2$ -COP:RFP or PDLP1:GFP and  $\alpha 2$ -COP:RFP in the *N. benthamiana* leaves  
395 with or without Exo1. Confocal imaging showed that when GFP:PdBG2 or PDLP1:GFP was  
396 co-expressed together with  $\alpha 2$ -COP:RFP in the absence of Exo1, the fluorescent signals were  
397 co-localized at PD (**Figure 10E, G**). In contrast with  $\alpha 1$ -COP, we did not observe a co-  
398 localization of GFP:PdBG2 and  $\alpha 2$ -COP:RFP in the cytoplasm after Exo1 treatment.  
399 Surprisingly, after Exo1 treatment, PDLP1:GFP was highly co-localized with  $\alpha 2$ -COP:RFP in  
400 the cytoplasm (**Figure 10F, H**). Collectively, our results suggest that  $\alpha 1$ -COP and  $\alpha 2$ -COP  
401 proteins independently involved in the proteins cargo machinery of GPI-anchored PdBG2 and  
402 non GPI-anchored PDLP1 proteins, which  $\alpha 1$ -COP is particularly subjected to the lipid raft-  
403 dependent manner (**Figure 12**).

404

#### 405 *$\alpha 1$ -cop mutants is susceptible against to *Botrytis cinerea**

406 Several studies have shown the link between SLs and callose homeostasis in response  
407 to biotic stimuli (Jacobs et al., 2003; Nishimura et al., 2003; Wang et al., 2008; Ellinger et al.,  
408 2013; Fang et al., 2016). We examined the possible involvement  $\alpha 1$ -COP activity in the plant  
409 defense response. First we grew and observed the intact phenotype of wild-type Col-0,  *$\alpha 1$ -cop*  
410 mutants along with  *$\alpha 1$ -COP* overexpression plants in normal condition, however we did not  
411 find a distinct phenotype, all genotypes were similar (**Supplemental Figure 12**). Next we  
412 challenged the loss of function of  *$\alpha 1$ -COP* and overexpression plants with *B. cinerea* (a  
413 necrotrophic fungus). Leaves from  *$\alpha 1$ -cop* mutants showed severe lesion of fungus infection.  
414 The diameters area of necrotic lesion in  *$\alpha 1$ -cop-1* and  *$\alpha 1$ -cop-5* mutants were significantly  
415 larger than in wild-type Col-0 and  *$\alpha 1$ -COP* overexpression plants (**Figure 11A, B**). In the  
416 previous study, a PD receptor-like protein, named LYSIN MOTIF DOMAIN-CONTAINING  
417 GLYCOSYLPHOSPHATIDYLINOSITOL-ANCHORED PROTEIN 2 (LYM2) is suggested  
418 to be an essential factor during *B. cinerea* infection in Arabidopsis (Faulkner et al., 2013; Vu et  
419 al., 2020). Since  $\alpha 1$ -COP is required for the proper intracellular trafficking of GPI-anchored  
420 PdBG2, we hypothesize that  $\alpha 1$ -COP is presumably associated with GPI-anchored LYM2  
421 functioning. Thus, the enhancement of susceptibility of  *$\alpha 1$ -cop-1* and  *$\alpha 1$ -cop-5* plants against  
422 *B. cinerea*, may due to the malfunction of LYM2 protein. Taken together, this result indicates

423 that the excessive callose deposition caused by the absence of  $\alpha 1$ -COP function results in a  
424 reduced plant defense response against to *B. cinerea*.

425

## 426 **DISCUSSIONS**

### 427 **Both $\alpha 1$ -COP and $\alpha 2$ -COP are partially located at PD, but only $\alpha 1$ -COP is involved in** 428 **callose-mediated phototropism**

429 COPI is comprised by seven subunits ( $\alpha/\beta/\beta'/\gamma/\delta/\epsilon/\zeta$ ) that have been classified into two  
430 sub complexes, the B- ( $\alpha/\beta'/\epsilon$ ) and F-sub complex ( $\beta/\delta/\gamma/\zeta$ ). In mammals, all the coatomer  
431 subunits have only one isoform, except  $\gamma$ -COP and  $\zeta$ -COP subunits, whereas yeast contains  
432 only one isoform for all coatomer subunits. In contrast to mammals and yeast, in *A. thaliana*  
433 and other higher plants, except  $\gamma$ -COP and  $\delta$ -COP subunits, every coatomer subunits have more  
434 than one isoform. Two  $\alpha$ -COP isoforms,  $\alpha 1$ - and  $\alpha 2$ -COP, have been characterized in  
435 Arabidopsis (Gimeno-Ferrer et al., 2017; Cabada Gomez et al., 2020). Here we showed that a  
436 missense mutation (G486D) and knockout T-DNA mutants of  *$\alpha 1$ -COP* exhibited excess callose  
437 accumulation (**Fig. 1**) and had no or little defect in plant growth under normal condition  
438 (**Supplemental Figure 12**). In contrast to  *$\alpha 1$ -cop* mutants, loss-of-function of  *$\alpha 2$ -COP*  
439 resembled wild-type Col-0 callose phenotype (**Supplemental Figure 3**), but the plant growth  
440 is severely impaired (Gimeno-Ferrer et al., 2017). These two  $\alpha$ -COP isoforms harbor the WD40  
441 domain at their N-terminal, which is required for intracellular trafficking of cargo proteins  
442 containing KKXX motif. Interestingly, as these isoforms share an amino acid sequence of 93%  
443 identity, the excessive callose phenotype and the absence of growth defects in the  *$\alpha 1$ -cop*  
444 mutants might be explained by their differences at the subcellular localization, COPI  
445 composition and cargo specificity of both isoforms. In the subcellular localization study, we  
446 have shown that both  $\alpha 1$ -COP and  $\alpha 2$ -COP partially located at PD channels (**Figure 2**,  
447 **Supplemental Figure 13**). Intriguingly,  $\alpha 2$ -COP is also detected in the nucleus (**Supplemental**  
448 **Figure 13**), moreover, since  $\alpha 1$ -COP interacted with  $\epsilon 1$ -COP,  $\beta' 2$ -COP and  $\delta$ -COP, we  
449 strikingly found that  $\alpha 2$ -COP did not interact with  $\beta' 2$ -COP, suggesting that  $\alpha 2$ -COP may has  
450 different COPI subunit to generate COPI complex (**Supplemental Figure 14A**). Thus, PD  
451 callose phenotype should be resulted from other different nature between  $\alpha 1$ -COP and  $\alpha 2$ -COP.  
452 For their cargo specificity, two sphingolipid enzymes exposing KKXX dilysin motif on their  
453 C-terminal tail (ERH1 and GCS) have been shown to be  $\alpha 1$ -COP-dependent cargo machinery,

454 but not  $\alpha 2$ -COP-dependent one (**Figure 12, Supplemental Figure 14B**), suggesting that dilysin  
455 motif itself is not sufficient for COPI recruitment. Nonetheless, further studies will be required  
456 to identify the differences between the functions of  $\alpha 1$ -COP and  $\alpha 2$ -COP in the callose turnover  
457 and plant growth. The results presented here indicate that  $\alpha 1$ -COP has a role in callose-regulated  
458 symplasmic continuity.

459

460  **$\alpha 1$ -COP regulates intracellular trafficking of GPI-anchored PdBG2 through lipid raft**  
461 **dependent pathway**

462 COPI vesicles are involved in several different intracellular transports of secretory  
463 proteins such as anterograde transport within the Golgi stack (Rothman, 1994; Orci et al., 1997),  
464 ER to Golgi transport (Pepperkok et al., 1993; Bednarek et al., 1995), and retrograde transports  
465 of GPI-anchored proteins (Sutterlin et al., 1997) and particular proteins that contain dilysine  
466 (KKXX) motif in their cytosolic C-terminal (Eugster et al., 2004; Jackson et al., 2012). In  
467 addition, it has been proven that COPI interacts with several sphingolipid molecules  
468 (Chaudhary et al., 1998; Contreras et al., 2012). Arabidopsis ERH1 and GCS proteins are two  
469 key SL pathway enzymes that are responsible in the conversion of ceramide species to produce  
470 inositolphosphorylceramide and glucosylceramide, respectively (Wang et al., 2008; Msanne et  
471 al., 2015). They contain dilysine motif at their C-terminus, which interact with COPI via  $\alpha 1$ -  
472 COP subunit (**Figure 3**). ERH1 and GCS mainly localizes to the Golgi, ER as well as partially  
473 at PD. Here, we also found that loss of  $\alpha 1$ -COP causes obvious defects in trafficking of ERH1  
474 and GCS proteins, which mostly localized to cytoplasm and were not found in the PD callose  
475 spot. This probably reflects the inability of ERH1 and GCS to enter into early secretory pathway  
476 under the absence of  $\alpha 1$ -COP. These results suggest the role of a specific  $\alpha 1$ -COP type of COPI  
477 in maintaining normal cellular function and intracellular trafficking of dilysine motif proteins,  
478 especially for several sphingolipid enzymes in Arabidopsis.

479 GIPCs and GlcCers are the most abundant sphingolipid species found in plasma  
480 membrane and other endomembranes which particularly required in the lipid raft formation.  
481 Moreover, PD-PM is enriched by lipid raft (Grison et al., 2015; Iswanto and Kim, 2017), and it  
482 have been reported that the proper form of lipid raft at PD is required for the GPI-anchored PD  
483 proteins localization such as PDCB1 and PdBG2 for maintaining callose level at PD neck region  
484 (Grison et al., 2015; Iswanto and Kim, 2017). Result from SLs analysis revealed that the



485 reduction of GlcCers and GlcHCers molecules in the  *$\alpha$ 1-cop* mutants indicates the positive role  
486 of  *$\alpha$ 1-COP* in the SL biosynthesis pathways (**Figure 6**). In yeast studies, it has been reported  
487 that mutations in the *ret1-1* ( *$\alpha$ -cop*) disturb the ER to Golgi transport of GPI-anchored proteins  
488 (Sutterlin et al., 1997). Interestingly, we also found that loss of  *$\alpha$ 1-COP* changes the subcellular  
489 localization of GPI-anchored PdBG2 which was mostly detected in the cytoplasm and was  
490 absent at PD (**Figure 7**). This probably reflects PdBG2's inability to enter standard COPI  
491 vesicles for its ER to Golgi anterograde transport in  *$\alpha$ 1-cop* mutants. The absence of GPI-  
492 anchored PdBG2 at PD channel might be caused from the mislocalizations of ERH1 and GCS  
493 in particular to provide a biological property at PD-PM.

494 In summary, all these results suggest that  $\alpha$ 1-COP plays a role in targeting GPI-anchored  
495 protein to PD-PM and in modulating callose turnover through physical interaction with SL  
496 modifiers and their delivery in Arabidopsis. This work provides a key clue in our understanding  
497 of PD regulation by COPI vesicle functioning especially in the intracellular trafficking  
498 pathways.

## 499 **METHODS**

### 500 **Plant materials and growth conditions**

501 The mutants used in this study were in the *A. thaliana* wild-type Col-0 ecotype. The  $\alpha 1$ -  
502 *cop-4* (single amino acid substitution, Glycine to Aspartic acid, G486D) mutant was obtained  
503 from M4 population of *dsGSL8*-RNAi treated with ethyl methanesulfonate (EMS). The T-DNA  
504 insertion lines  $\alpha 1$ -*cop-1* (SALK\_078465),  $\alpha 1$ -*cop-5* (SALK\_003425),  $\alpha 2$ -*cop-1*  
505 (SALK\_103968),  $\alpha 2$ -*cop-2* (SALK\_1229034), *erh1-1* (SALK\_206784) and *gcs-2*  
506 (CS10111117) were obtained from the ABRC Arabidopsis stock center. These mutants were  
507 verified by PCR analysis using with T-DNA specific and flanking primers. The seeds were  
508 surface sterilized with 25% (v/v) bleach for 15 min, washed four times with sterile water, and  
509 kept in darkness at 4 °C for 3 days before they were planted on agar Murashige and Skoog (MS)  
510 medium. Plants were grown at 22 °C under 16 h light/8 h dark cycle.

511

### 512 **Plasmid Constructs**

513 To create stable lines overexpressing  $\alpha 1$ -COP, ERH1 and GCS or to perform transient  
514 localization assay of  $\alpha 1$ -COP,  $\alpha 1$ -COP<sup>G486D</sup>,  $\epsilon 1$ -COP,  $\beta 2$ -COP,  $\delta$ -COP, ERH1, GCS, PDLP1,  
515 PDLP2 and PDLP5. PCR products (with/without stop codon) amplified from coding sequence  
516 (CDS) were first cloned in the pDONR207 plasmid (Invitrogen). The resultant entry clones  
517 were subsequently transformed into gateway binary vectors; pMDC43, pMDC83 (Curtis and  
518 Grossniklaus, 2003), pH7RWG2.0 (Karimi et al., 2002), myc-pBA, pDEST-GWVYNE, pDEST-  
519 VYNE(R), pDEST-GWVYCE and pDEST-VYCE(R)<sup>GW</sup> (Gehl et al., 2009) to fuse GFP, RFP,  
520 Myc, Venus-N and Venus-C tags, respectively. PdBG2 construction was performed as previous  
521 described (Iswanto et al., 2020). To generate fusion protein of  $\alpha 2$ -COP, the introns-exons  
522 containing genomic DNA was amplified from ATG to (with/without) stop codon. PCR products  
523 were first cloned in the pDONR207 plasmid. The resultant entry clones were subsequently  
524 transformed into gateway binary vectors; pMDC43, pMDC83 and pDEST-VYCE(R)<sup>GW</sup>.

525

### 526 **Plant transformation and transgenic plant screening**

527 Transgenic Arabidopsis plants were obtained by *Agrobacterium tumefaciens*-mediated  
528 transformation (Zhang et al., 2006). The developing Arabidopsis inflorescences were dipped

529 0.03% (v/v), 3% (m/v) sucrose and *Agrobacterium* cells carrying the chosen vectors for 5  
530 seconds. T1 seeds were grown on selective media to screen transgenic *Arabidopsis* plants.

531

### 532 ***B. cinerea* infection assay**

533 The plant was grown in a growth chamber under 12/12h light/dark at 22°C, 60% relative  
534 humidity. A challenging pathogen, *B. cinerea*, was cultivated on PDA (Potato Dextrose Broth  
535 24 g, Agar 20 g, ddH<sub>2</sub>O 1 L) at 27°C for 7 days. Mycelium and spores were collected with  
536 sterile water and was filtered using the three layers of sterilized cheesecloth to collect spores.  
537 The spore concentration was adjusted to 1x10<sup>5</sup> CFU/mL using the Hemocytometer  
538 (SUPERIOR, Lauda, DE). Rosette stage of *A. thaliana* of the wild type and the mutants were  
539 used in the experiment to confirm susceptibility against *B. cinerea*. The spore (5 uL; 10<sup>5</sup>  
540 CFU/mL) was inoculated per leaf of *A. thaliana*. The plant was covered with parafilm to avoid  
541 dispersion of conidia spore and to maintain high humidity (95-100%). Experimental repetition  
542 per line was performed three leaves per plants for 5 plants. After 5 days inoculation, necrosis  
543 symptoms were evaluated. Diameter on the leaves was measured using Image J program. Two-  
544 sided Dunnett's Multiple Comparisons was performed to determine significant difference in  
545 disease incidence ( $P < 0.05$ ). Statistix 8 (version 8.0) was used as the analytical software.

546

### 547 **Aniline Blue Staining**

548 *Arabidopsis* hypocotyls, root tips and rosette leaves were kept in callose staining buffer  
549 (CSB) for 3 h in darkness. CSB was a mixture of 0.1% (w/v) aniline blue in autoclaved triple-  
550 distilled water and 1 M glycine (pH 9.5) at a volume ratio of 2:3. The samples were then washed,  
551 and the fluorescence was detected under a confocal microscope. During quantification, yellow  
552 square dotted lines were selected as a region of interest (ROI) and the mean relative  
553 fluorescence intensity was measured using ImageJ (<https://imagej.nih.gov/ij/>). For additional  
554 information on quantification of callose using aniline blue staining, see (Zavaliev et al., 2011;  
555 Zavaliev et al., 2013).

556

### 557 **Hypocotyl Loading Assay**

558 To measure symplasmic connectivity using the HPTS (8-Hydroxypyrene-1, 3, 6-  
559 trisulfonic acid trisodium salt, SIGMA-ALDRICH) dye movement assay, a symplasmic dye

560 tracer, was loaded on the top of sharply trimmed etiolated three-day-old Arabidopsis hypocotyls  
561 as shown in previous publications (Han et al., 2014; Kumar et al., 2016). A cover slip was  
562 placed between each cut hypocotyl surface and the MS agar. For dye loading, individual agar  
563 blocks containing HPTS (5 mg/mL) were placed on the cut hypocotyl surface. After a 5 min  
564 loading period, the seedlings were washed in water for 15 min, and then fluorescent probe  
565 movements were observed by confocal microscopy (Kumar et al., 2016).

566

### 567 **RNA extraction and QRT-PCR analyses**

568 Total RNA was extracted from 10-day-old Arabidopsis seedlings with an RNeasy®  
569 Plant Mini Kit (QIAGEN) according to the manufacturer's instructions. First-strand  
570 complementary DNA synthesis was performed using 1 µg of total RNA with an anchored oligo  
571 (dT) and Transcriptor Reverse Transcriptase (QIAGEN) following the manufacturer's protocol.  
572 Quantitative RT-PCR was conducted on 384-well plates using the Light Cycler 480 system  
573 (Biorad) and the QuantiSpeed SYBR Green Kit (PhileKorea) under the following conditions:  
574 denaturation for 5 min at 95 °C, 40 cycles of 10 s at 95 °C for denaturation and 10 s at 60 °C  
575 for annealing. Each reaction was performed with 3 µL of 1:20 (v/v) dilution of the first  
576 complementary DNA strand, with 0.5 µM of each primers (**Supplemental Table 1**) in a total  
577 reaction volume of 10 µL. The QRT-PCR data represent mean value of two independent  
578 biological experiments, with four technical replicates after normalization with the four  
579 reference transcripts (*ACTIN2*, *UBQ10*, *UBC9* and *EF-1α*) shown before to exhibit invariable  
580 expression levels.

581

### 582 **Bimolecular fluorescence complementation (BiFC) assays**

583 The CDSs of *α1-COP*, *α2-COP*, *β'2-COP*, *ε1-COP*, *ε2-COP*, *δ-COP*, *ERH1*, *GCS* and  
584 *LOH1* were cloned into a set of binary BiFC-Gateway vectors; pDEST-GWVYNE (Venus aa 1-  
585 173), pDEST-VYNE(R)<sup>GW</sup> (Venus aa 1-173), pDEST-GWVYCE (Venus aa 156-239) and  
586 pDEST-VYCE(R)<sup>GW</sup> (Venus aa 156-239) with kanamycin selection marker in *E.coli* and *A.*  
587 *tumefaciens*. The combination of proteins (in the relevant figure) was transiently co-expressed  
588 in *N. benthamiana*. Venus fluorescent signals were observed at 72 h post infiltration under  
589 OLYMPUS FV1000-LDPSU (Olympus, Japan) confocal laser-scanning  
590 microscope.

591

## 592 **Co-immunoprecipitation (Co-IP) assay**

593 The combination of proteins (in the relevant figure) were transiently expressed in *N.*  
594 *benthamiana*. For bead preparation, 75  $\mu$ l of protein A agarose was washed in 500  $\mu$ l IP buffer  
595 (100 mM Tris-HCl pH 7.5, 150 mM NaCl, 1 mM EDTA pH 8.0, 0.5% NP40, ddH<sub>2</sub>O, 3mM  
596 DTT) with 1:100 complete protease inhibitor cocktail (Roche) and centrifuged at 3000 rpm for  
597 1 min at 4<sup>0</sup>C. The washing step was repeated for 3 times. The protein A agarose bead was added  
598 with 450  $\mu$ l of IP buffer and 5  $\mu$ l of Myc antibody (Cell Signaling). The mixture was then  
599 incubated on rotator at 4<sup>0</sup>C for 4 h. Next, 1 g fresh weight of infiltrated leaves were collected 3  
600 days after infiltration. The tissues were ground in 3 ml IP buffer. The broken tissues were  
601 transferred to the filter and aliquoted into eppendorf tubes. The samples were centrifuged at  
602 12.000 rpm for 5 min at 4<sup>0</sup>C to remove cell debris. 15  $\mu$ l of supernatants (total proteins) served  
603 as the input controls. 450  $\mu$ l of supernatants were then incubated with 55  $\mu$ l of protein A agarose  
604 conjugated with Myc antibody on rotator at 4<sup>0</sup>C for 12 h. The protein A agarose beads were  
605 then spun down at 3000 rpm for 2 min at 4<sup>0</sup>C and washed three times with IP buffer. After the  
606 last centrifugation, supernatants were removed and beads were adjusted up to 40  $\mu$ l with IP  
607 buffer. Proteins associated with the Myc-fusion proteins were eluted by adding 10  $\mu$ l of 5x  
608 sample loading buffer and heating at 70<sup>0</sup>C for 5 min. The eluted proteins were analyzed by  
609 immunoblot assay. Primary antibodies used in this study were Myc-Tag (9B11) Mouse mAb  
610 (Cell Signaling) and Anti-GFP (abcam ab6556). Secondary antibodies used in this study were  
611 Anti-mouse IgG, HRP-linked antibody (Cell Signaling) and Anti-Rabbit IgG (H+L) Conjugate  
612 (Promega).

613

## 614 **Confocal Microscopy**

615 Confocal fluorescence microscopy was performed with an OLYMPUS FV1000-  
616 LDPSU (Olympus, Japan) inverted confocal microscope using 20X/0.8 oil-immersion objective  
617 or 40X/1.3 oil-immersion objective. GFP was excited with a laser using 488 nanometer beam  
618 splitter. RFP and FM4-64 were excited with a laser using 543 nanometer beam splitter. YFP  
619 was excited with a laser using 515 nanometer beam splitter. Aniline blue and DAPI were excited  
620 with a laser using 405 nanometer beam splitter. Signal intensities from GFP, YFP and aniline  
621 blue (callose detection) were quantified with ImageJ software for statistical analyses.

622

### 623 **Sphingolipid extraction and sphingolipid analysis**

624 Plant samples preparation for SL inhibitors treatments; Arabidopsis seeds from each  
625 genotypes; wild-type Col-0, *al-cop-1*, *al-cop-5*, *α1-COP-OE#2* and *α1-COP-OE#3* were  
626 grown on normal MS medium for 14 days. Two-week-old seedlings were immediately frozen  
627 in liquid nitrogen and ground to a fine powder ( $n = 250$ , 4 independent biological experiments).  
628 For plant sphingolipid analysis, the total lipids were extracted from 3 mg of lyophilized  
629 Arabidopsis seedlings using the combined upper phase (220  $\mu\text{L}$ ) and lower phase (110  $\mu\text{L}$ ) of  
630 methyl-*tert*-butyl ether (MTBE)/methanol/water (100:30:35,  $v/v/v$ ) described previously (Chen  
631 et al., 2013). Extracts were reconstituted in 100  $\mu\text{L}$  chloroform/methanol (1:9,  $v/v$ ).  
632 Sphingolipids profiling was performed using a Nexera2 LC system (Shimadzu Corporation,  
633 Kyoto, Japan) connected to a triple quadrupole mass spectrometer (LC-MS 8040; Shimadzu,  
634 Kyoto, Japan) with reversed phase Kinetex C18 column (100  $\times$  2.1 mm, 2.6  $\mu\text{m}$ , Phenomenex,  
635 Torrance, CA, USA) for chromatographic separations of lipids. Mobile phase A consisted of  
636 water/methanol (1:9,  $v/v$ ) containing 10 mM ammonium acetate, and mobile phase B consisted  
637 of isopropanol/methanol (5:5,  $v/v$ ) containing 10 mM ammonium acetate. To achieve  
638 chromatographic separation, a gradient elution program was optimized as follows: 0 min, 30%  
639 B; 0-15 min, 95% B; 15-20 min, 95% B; 20-25 min, 30% B. The flow rate was set a 200  $\mu\text{L}$   
640  $\text{min}^{-1}$ . 5  $\mu\text{L}$  sample volumes were injected for each run. To achieve sphingolipid quantifications,  
641 the calculated ratio of analyte and internal standard is multiplied by the concentration of the  
642 internal standard to obtain the concentration for each lipid species (Xia and Jemal, 2009; Bure  
643 et al., 2013; Lee et al., 2017; Im et al., 2019). Since there is no commercial internal standard  
644 for the quantification of GIPC molecular species, ganglioside GM<sub>1</sub> is often used as an  
645 alternative to it (Markham and Jaworski, 2007; Tellier et al., 2014). We performed quantitative  
646 analysis of SLs using one-point calibrations of each target SL species [dihydrosphingosine  
647 d17:0/LCBs, non-hydroxy-phytoceramide (t18:0/8:0)/Ceramide, alpha-hydroxy-  
648 phytoceramide (t18:0/h6:0)/hydroxyceramide, glucosyl-ceramide (d18:1/12:0)/GlcCer or  
649 GlcHCer, and GM<sub>1</sub> (d18:1/18:0)/GIPC with known concentration]. Non-hydroxy-  
650 phytoceramide [(t18:0/8:0), MW = 443.6] and alpha-hydroxy-phytoceramide [(t18:0/h6:0),  
651 MW = 431.6] were synthesized by Kyungpook University (Daegu, Korea) and other internal

652 standards were purchased from Matreya (Pleasant Gap, PA, USA) or Avanti Polar Lipids  
653 (Alabaster, AL, USA).

654

### 655 **Data analyses and experimental repeats**

656 The statistical analysis and sample size or number for each experiment were listed in  
657 the relevant figures and figure legends. All experiments in this study, at least were conducted  
658 with three independent replications, see (**Supplemental Table 2**) for the summary of statistical  
659 tests.

660

### 661 **Accession numbers**

662 Accession numbers for the genes characterized in this work, see (**Supplemental Table**  
663 **3**).

664

### 665 **Supplemental Data**

666 **Supplemental Figure 1.** Next Generation Mapping (NGM) and phototropic response analysis  
667 in the  *$\alpha 1$ -cop* mutants.

668 **Supplemental Figure 2.**  $\alpha 1$ -COP overexpression lines reduce callose level.

669 **Supplemental Figure 3.** Callose deposition and phototropic response analyses in the  *$\alpha 2$ -cop*  
670 mutants.

671 **Supplemental Figure 4.**  $\alpha 1$ -COP interacts with F-subcomplex and B-subcomplex members.

672 **Supplemental Figure 5.** Single amino acid substitution does not alter the subcellular  
673 localization of  $\alpha 1$ -COP.

674 **Supplemental Figure 6.** Arabidopsis wild-type Col-0 and  *$\alpha 1$ -cop-5* plants expressing  
675 ERH1:GFP.

676 **Supplemental Figure 7.** BFA disrupts intracellular transport of  $\alpha 1$ -COP and ERH1 proteins.

677 **Supplemental Figure 8.** Quantitative RT-PCR analyses of sphingolipid enzymes in the wild-  
678 type Col-0,  *$\alpha 1$ -cop-5* mutant and  $\alpha 1$ -COP-OE#2 overexpression plants.

679 **Supplemental Figure 9.** Subcellular localization of PDLP(s) proteins in the  *$\alpha 1$ -cop-5* mutant.

680 **Supplemental Figure 10.** Quantitative RT-PCR analyses of callose degradation enzymes in  
681 wild-type Col-0,  *$\alpha 1$ -cop-5* mutant and  $\alpha 1$ -COP-OE#2 plants.

682 **Supplemental Figure 11.** Subcellular localization of  $\alpha 2$ -COP and ERH1 in the presence of  
683 Exo1.

684 **Supplemental Figure 12.** Growth of wild-type Col-0, *α1-cop* mutants and  $\alpha$ 1-COP  
685 overexpression plants.

686 **Supplemental Figure 13.** Subcellular localization of  $\alpha$ 2-COP protein.

687 **Supplemental Figure 14.** The interaction partner analysis of  $\alpha$ 2-COP protein with COPI sub-  
688 complex members and sphingolipid modifier enzymes.

689 **Supplemental Table 1.** Primers used in this study.

690 **Supplemental Table 2.** Summary of statistical tests.

691 **Supplemental Table 3.** Accession numbers for the genes characterized in this work

692

### 693 **ACKNOWLEDGMENTS**

694 This work was supported by the National Research Foundation of Korea Grant NRF  
695 2018R1A2A1A05077295, 2020M3A9I4038352 and 2020R1A6A1A03044344.

696

### 697 **AUTHOR CONTRIBUTIONS**

698 ABBI, MHV, RK, JCS, SW, DRK, KYS, SGH, HK, WYK, SHK, KHL and JYK  
699 conceived the study. ABBI. performed experiments, analyzed data and wrote the manuscript.  
700 ABBI. and JYK designed experiments. MHV, RK, JCS, SW, DRK, KYS, SGH, HK, WYK,  
701 SHK, and KHL performed experiments. All authors contributed to and edited the final  
702 manuscript.



703 **FIGURE LEGENDS**

704 **Figure 1. Callose accumulation is increased in the *α1-cop* mutants.**

705 (A) Nucleotide sequence alignment of *α1-COP* WT (wild-type Col-0) and *α1-COP* EMS  
706 mutant. The red box indicates single nucleotide mutation (G to A).

707 (B) Amino acid (AA) sequence alignment of *α1-COP* WT and *α1-COP*<sup>G486D</sup> (EMS mutant). The  
708 red box indicates single AA mutation (G to D).

709 (C) Gene structure of *α1-COP* with three allele mutations. *α1-cop-4* was generated from EMS  
710 mutation and identified by NGS-based mapping. *α1-cop-1* and *α1-cop-5* were collected from  
711 ABRC as T-DNA insertions.

712 (D) RT-PCR analysis from wild type and *α1-cop* mutants. One pair primer was designed at the  
713 C-terminal domain close to 3'UTR region as shown in the figure (A).

714 (E) Callose deposition analysis of Arabidopsis hypocotyls from wild-type Col-0 and *α1-cop*  
715 mutants. Scale bars: 100 μm.

716 (F) Relative callose intensity quantification of Arabidopsis hypocotyls (*n*=10).

717 (G) Callose deposition analysis of Arabidopsis rosette leaves. Scale bars: 100 μm.

718 (H) Relative callose intensity quantification of Arabidopsis rosette leaves (*n*=15). All 3  
719 independent biological experiments were performed and statistical significances were done by  
720 One-Way ANOVA with Tuckey-Kramer test. Yellow square dotted lines (E, G) were designated  
721 as region of interest (ROI) for measuring signal intensity.

722

723 **Figure 2. *α1-COP* is localized at *trans*-Golgi compartment and partially localized at PD.**

724 (A) Confocal images of *N. benthamiana* epidermal cells transiently expressing 3 different  
725 fusion proteins of *α1-COP*. Both GFP and RFP signals were detected at the cell periphery and  
726 exhibited PD-like punctate localization. Scale bars: 50 μm.

727 (B) Confocal images of *N. benthamiana* epidermal cells transiently expressing *α1-COP*:RFP  
728 and ERH1:GFP (*trans*-Golgi protein). Merge picture with green and red signals showed that  
729 *α1-COP*:GFP is localized to *trans*-Golgi compartment. Scale bars: 50 μm.

730 (C) Transient expression of GFP:*α1-COP* and chemical staining of callose using aniline blue.  
731 The white arrows illustrate co-localization at PD, whereas the blue arrows illustrate the GFP  
732 signals do not co-localize with Aniline blue signal. Scale bars: 20 μm.

733 **(D)** Arabidopsis hypocotyl transgenic plant expressing GFP: $\alpha$ 1-COP stained with aniline blue.  
734 The white arrows illustrate co-localization at PD. Scale bars: 50  $\mu$ m.

735

736 **Figure 3.  $\alpha$ 1-COP interacts with ERH1 and GCS.**

737 **(A)** BiFC assay of the interactions between  $\alpha$ 1-COP and ERH1,  $\alpha$ 1-COP and GCS,  $\alpha$ 1-COP<sup>G486</sup>  
738 and ERH1,  $\alpha$ 1-COP<sup>G486</sup> and GCS. Various combinations of BiFC vectors were transiently  
739 expressed in *N. benthamiana* leaves. The infiltrated leaves were subjected for confocal imaging  
740 3-days post infiltration. Three biological replicates were performed for each sample. Scale bars  
741 = 50  $\mu$ m.

742 **(B)** Co-IP analysis of the interaction between  $\alpha$ 1-COP and ERH1,  $\alpha$ 1-COP and GCS,  $\alpha$ 1-  
743 COP<sup>G486</sup> and ERH1,  $\alpha$ 1-COP<sup>G486</sup> and GCS. Various combinations of Myc-ERH1, Myc-GCS,  
744 GFP-  $\alpha$ 1-COP and GFP- $\alpha$ 1-COP<sup>G486</sup> fusion proteins as indicated were transiently expressed in  
745 *N. benthamiana* leaves followed by IP using protein A agarose bead. A GFP or Myc antibody  
746 was used to detect the proteins.

747 **(C)**  $\alpha$ 1-COP, ERH1 and GCS interactions are partially located at PD. Confocal images of *N.*  
748 *benthamiana* leaves agro-infiltrated with BiFC constructs of ERH1:Venus-N, GCS:Venus-N,  
749 and  $\alpha$ 1-COP:Venus-C (co-expressed with PDLP5-RFP). Green fluorescence resulting from the  
750 interactions of ERH1:Venus-N and  $\alpha$ 1-COP:Venus-C, GCS:Venus-N and  $\alpha$ 1-COP:Venus-C  
751 were observed at the cell periphery. The green spots co-localize with the red fluorescent signals  
752 emitted by RFP-labeled PDLP5 (white arrows). Three biological replicates were performed for  
753 each sample. Scale bars: 20  $\mu$ m.

754

755 **Figure 4. Plasmodesmata localization of ERH1 is altered in the  $\alpha$ 1-cop-5 mutant.**

756 **(A)** ERH1 and PDLP5 is partially co-localized at PD. Confocal images of *N. benthamiana*  
757 epidermal cells transiently expressing ERH1:GFP and PDLP5:RFP. White arrows indicate co-  
758 localization signals from GFP and RFP, whereas yellow arrow indicates GFP signals do not co-  
759 localize with RFP signals. Scale bars: 50  $\mu$ m.

760 **(B)** Western blot analysis of ERH1 protein expressed in the wild-type Col-0 and  *$\alpha$ 1-cop-5*  
761 mutant plants.

762 **(C)** Arabidopsis primary root of wild-type Col-0 plant expressing ERH1:GFP. The GFP signals  
763 in specific punctate spots are indicated by white arrows. Scale bars: 80  $\mu$ m.

764 **(D)** Arabidopsis primary root of wild-type Col-0 plant expressing ERH1:GFP. The GFP signals  
765 in specific punctate spots are indicated by white arrows. Scale bars: 30  $\mu\text{m}$ .

766 **(E)** Arabidopsis primary root of *al-cop-5* mutant expressing ERH1:GFP. Scale bars: 30  $\mu\text{m}$ .

767 **(F)** GFP-tagged ERH1 signals are partially co-localized with aniline blue-stained callose in the  
768 primary root of Arabidopsis transgenic plant (wild-type Col-0 background). White arrows  
769 illustrate GFP signals co-localized with aniline blue signals (magenta) at PD. Scale bar: 40  $\mu\text{m}$ .

770 **(G)** GFP-tagged ERH1 signals do not co-localize (yellow arrows) with aniline blue-stained  
771 callose (magenta) in the primary root of Arabidopsis transgenic plant (*al-cop-5* mutant  
772 background). Scale bar: 40  $\mu\text{m}$ .

773

774 **Figure 5. Subcellular localization of GCS is altered in the *al-cop-5* mutant.**

775 **(A)** *N. benthamiana* epidermal cells transiently expressing fluorescent fusion proteins of  
776 GCS:GFP and HDEL:RFP. White arrows indicate co-localization of GFP and RFP signals at  
777 ER. Blue arrows indicate GFP signals do not co-localize with RFP signals. Scale bars: 50  $\mu\text{m}$ .

778 **(B)** Confocal images of *N. benthamiana* epidermal cells transiently expressing ERH1:GFP and  
779 GCS:RFP. White arrows indicate co-localization of GFP and RFP signals. Scale bars: 50  $\mu\text{m}$ .

780 **(C)** Confocal images of *N. benthamiana* epidermal cells transiently expressing GCS:GFP.  
781 Sample was stained with aniline blue for PD localization analysis. Scale bar: 50  $\mu\text{m}$ .

782 **(D)** Confocal images of *N. benthamiana* epidermal cells transiently expressing GCS:GFP **(C)**  
783 in yellow square line. White arrows indicate co-localization of GFP and magenta (aniline blue)  
784 signals at PD. Scale bar: 20  $\mu\text{m}$ .

785 **(E, F)** Transgenic GCS:GFP Arabidopsis wild-type Col-0 **(E)** and *al-cop-5* mutant **(F)**  
786 showing fluorescence as punctate spots on the cell walls and in cytoplasm of primary root cells,  
787 respectively. White arrows indicate the GFP signals co-localize with aniline blue signals  
788 (magenta) at PD. Yellow arrows indicate the GFP signals do not co-localize with aniline blue  
789 signals (magenta) at PD Scale bar: 20  $\mu\text{m}$ .

790

791 **Figure 6. Loss-of-function of *al-COP* reduces ceramides, GlcCers and GlcHCers.**

792 **(A-F)** Measurement of SLs from wild-type Col-0, *al-cop-1*, *al-cop-5*, *al-COP-OE#2* and *al-*  
793 *COP-OE#3* plants included total LCBs **(A)**, total ceramides **(B)**, total hydroxyceramides **(C)**,  
794 total GlcCers **(D)**, total GlcHCers **(E)** and total GIPCs **(F)**. **(G-K)** SLs species characterized by

795 LCB (d18:0, d18:1, d18:2, t18:0 and t18:1) and fatty acid (FA) (16:0–26:1) from wild-type Col-  
796 0, *α1-cop-1*, *α1-cop-5*, *α1-COP-OE#1* and *α1-COP-OE#2* overexpression plants included  
797 ceramides (**G**), hydroxyceramides (**H**), GlcCers (**I**), GlcHCers (**J**) and GIPCs (**K**).  
798 Measurements are the average of four independent biological experiments ( $n = 200$ ). Data are  
799 means  $\pm$  s.d. Statistical significances were done by two-tailed Student's t-test;  $*P < 0.05$ ,  
800  $**P < 0.01$ .

801

802 **Figure 7. Subcellular localization of PdBG2 protein is altered in the *α1-cop-5* mutant.**

803 (**A, B**) Transgenic GFP:PdBG2 expression in the cotyledon of Arabidopsis wild-type Col-0 (**A**)  
804 and *α1-cop-5* mutant (**B**). PdBG2 co-localizes with aniline blue-stained callose at PD in wild-  
805 type Col-0 (white arrows), but not in *α1-cop-5* mutant (yellow arrows). Scale bars: 20  $\mu$ m.

806 (**C, D**) Transgenic GFP:PdBG2 expression in the hypocotyl of Arabidopsis wild-type Col-0 (**C**)  
807 and *α1-cop-5* mutant (**D**). PdBG2 co-localizes with aniline blue-stained callose at PD in wild-  
808 type Col-0 (white arrows), but not in *α1-cop-5* mutant (yellow arrows). Scale bars: 10  $\mu$ m.

809

810 **Figure 8. Excessive callose accumulation is maintained in the *α1-cop-5* overexpressing**  
811 ***ERH1* or *GCS* plants.**

812 (**A**) Gene structure of *ERH1* with one allele mutation. Two pair primers (LP-RP, and LB-RP)  
813 were used for T-DNA genotyping analysis. For RT-PCR analysis, one pair primer was designed  
814 in the exon parts of C-terminal region of *ERH1*.

815 (**B**) T-DNA genotyping of *erh1-1* mutant using 2 pair primers (LP+RP) and (LB-RP), as shown  
816 in (**A**).

817 (**C**) RT-PCR analysis from wild type and *erh1-1* mutant. The amplicons were obtained from  
818 one pair primer as shown in figure (**A**). *ACTIN2* was selected as reference gene.

819 (**D**) Callose deposition analysis of Arabidopsis hypocotyls from each genotypes. Yellow square  
820 dotted lines were designated as region of interest (ROI) for measuring signal intensity. Scale  
821 bars: 50  $\mu$ m.

822 (**E**) Relative callose intensity quantification of Arabidopsis hypocotyls (**D**). Statistical  
823 significance was done by One-Way ANOVA with Tukey-Kramer test. ( $n = 25$ ).

824

825 **Figure 9. Subcellular localization of  $\alpha$ 1-COP and ERH1 in the presence of Exo1.**

826 (A) Confocal images of cells transiently expressing GFP: $\alpha$ 1-COP and VAMP721:RFP in mock  
827 condition.

828 (B) Confocal images of cells transiently expressing GFP: $\alpha$ 1-COP and VAMP721:RFP in the  
829 presence of Exo1.

830 (C) Confocal images of cells transiently expressing ERH1:GFP and VAMP721:RFP in mock  
831 condition.

832 (D) Confocal images of cells transiently expressing ERH1:GFP and VAMP721:RFP in the  
833 presence of Exo1.

834 (E) Confocal images of cells transiently expressing ERH1:GFP and  $\alpha$ 1-COP:RFP in mock  
835 condition.

836 (F) Confocal images of cells transiently expressing ERH1:GFP and  $\alpha$ 1-COP:RFP in the  
837 presence of Exo1. *N. benthamiana* epidermal cells were used for colocalization studies. White  
838 arrows indicate colocalization of GFP and RFP signals, and yellow arrows indicate non  
839 colocalization. Scale bars (A-F) = 2  $\mu$ m.

840

841 **Figure 10. PdBG2 and  $\alpha$ 1-COP are retained in the same cellular compartment.**

842 (A, B) Confocal images of cells transiently expressing GFP:PdBG2 and  $\alpha$ 1-COP:RFP in mock  
843 condition (A) and Exo1 treated condition (B).

844 (C, D) Confocal images of cells transiently expressing PDLP1:GFP and  $\alpha$ 1-COP:RFP in mock  
845 condition (C) and Exo1 treated condition (D).

846 (E, F) Confocal images of cells transiently expressing PDLP1:GFP and  $\alpha$ 2-COP:RFP in mock  
847 condition (E) and Exo1 treated condition (F).

848 (G, H) Confocal images of cells transiently expressing GFP:PdBG2 and  $\alpha$ 2-COP:RFP in mock  
849 condition (G) and Exo1 treated condition (H). *N. benthamiana* epidermal cells were used for  
850 colocalization studies. White arrows indicate colocalization of GFP and RFP signals, and  
851 yellow arrows indicate non colocalization. Scale bars = 2  $\mu$ m in A-D, 5  $\mu$ m in E-H.

852

853 **Figure 11. Susceptibility analysis of  $\alpha$ 1-cop mutants against to *Botrytis cinerea*.**

854 (A) Disease symptoms observation in 5 days post infection (dpi).

855 **(B)** Leaf necrosis diameter were calculated at 5 dpi by measuring three leaves per plants for 5  
856 plants. Two-sided Dunnett's Multiple Comparisons was performed to determine significant  
857 difference with wild-type Col-0. (\* $P < 0.05$ ).

858

859 **Figure 12. Schematic model of the role of  $\alpha$ 1-COP in the regulation of the PD.**

860 Sphingolipids are required for the formation of lipid rafts at PD-PM. SL modifier enzymes  
861 ERH1 and GCS facilitate the formation of more complex SLs-modulated lipid rafts. However,  
862 the translocation of ERH1 and GCS is dependent on an existence of  $\alpha$ 1-COP protein (not  $\alpha$ 2-  
863 COP protein) through direct binding activity. In the absence of  $\alpha$ 1-COP, ERH1 and GCS are not  
864 found at PD eventually alters lipid raft composition at PD-PM. The alteration of lipid rafts  
865 composition particularly effects on the subcellular localization of PdBG2 (callose degrading  
866 enzyme) leading a stabilization of callose deposition.

867

868 **References**

- 869 **Ahn, H.K., Kang, Y.W., Lim, H.M., Hwang, I., and Pai, H.S.** (2015). Physiological  
870 Functions of the COPI Complex in Higher Plants. *Molecules and cells* **38**, 866-875.
- 871 **Ali, U., Li, H., Wang, X., and Guo, L.** (2018). Emerging Roles of Sphingolipid Signaling in  
872 Plant Response to Biotic and Abiotic Stresses. *Molecular plant* **11**, 1328-1343.
- 873 **Barratt, D.H., Kolling, K., Graf, A., Pike, M., Calder, G., Findlay, K., Zeeman, S.C., and**  
874 **Smith, A.M.** (2011). Callose synthase *GSL7* is necessary for normal phloem transport  
875 and inflorescence growth in *Arabidopsis*. *Plant physiology* **155**, 328-341.
- 876 **Bayer, E.M., Mongrand, S., and Tilsner, J.** (2014). Specialized membrane domains of  
877 plasmodesmata, plant intercellular nanopores. *Frontiers in plant science* **5**, 507.
- 878 **Bednarek, S.Y., Ravazzola, M., Hosobuchi, M., Amherdt, M., Perrelet, A., Schekman, R.,**  
879 **and Orci, L.** (1995). COPI- and COPII-coated vesicles bud directly from the  
880 endoplasmic reticulum in yeast. *Cell* **83**, 1183-1196.
- 881 **Benitez-Alfonso, Y., Faulkner, C., Pendle, A., Miyashima, S., Helariutta, Y., and Maule,**  
882 **A.** (2013). Symplastic intercellular connectivity regulates lateral root patterning.  
883 *Developmental cell* **26**, 136-147.
- 884 **Bure, C., Ayciriex, S., Testet, E., and Schmitter, J.M.** (2013). A single run LC-MS/MS  
885 method for phospholipidomics. *Analytical and bioanalytical chemistry* **405**, 203-213.
- 886 **Cabada Gomez, D.A., Chavez, M.I., Cobos, A.N., Gross, R.J., Yescas, J.A., Balogh, M.A.,**  
887 **and Indriolo, E.** (2020). COPI complex isoforms are required for the early acceptance  
888 of compatible pollen grains in *Arabidopsis thaliana*. *Plant reproduction*.
- 889 **Caillaud, M.C., Wirthmueller, L., Sklenar, J., Findlay, K., Piquerez, S.J., Jones, A.M.,**  
890 **Robatzek, S., Jones, J.D., and Faulkner, C.** (2014). The plasmodesmal protein PDL1  
891 localises to haustoria-associated membranes during downy mildew infection and  
892 regulates callose deposition. *PLoS pathogens* **10**, e1004496.
- 893 **Chaudhary, A., Gu, Q.M., Thum, O., Profit, A.A., Qi, Y., Jeyakumar, L., Fleischer, S.,**  
894 **and Prestwich, G.D.** (1998). Specific interaction of Golgi coatomer protein alpha-COP  
895 with phosphatidylinositol 3,4,5-trisphosphate. *The Journal of biological chemistry* **273**,  
896 8344-8350.
- 897 **Chen, S., Hoene, M., Li, J., Li, Y., Zhao, X., Haring, H.U., Schleicher, E.D., Weigert, C.,**  
898 **Xu, G., and Lehmann, R.** (2013). Simultaneous extraction of metabolome and  
899 lipidome with methyl tert-butyl ether from a single small tissue sample for ultra-high  
900 performance liquid chromatography/mass spectrometry. *Journal of chromatography. A*  
901 **1298**, 9-16.
- 902 **Contreras, F.X., Ernst, A.M., Haberkant, P., Bjorkholm, P., Lindahl, E., Gonen, B.,**  
903 **Tischer, C., Elofsson, A., von Heijne, G., Thiele, C., Pepperkok, R., Wieland, F.,**  
904 **and Brugger, B.** (2012). Molecular recognition of a single sphingolipid species by a  
905 protein's transmembrane domain. *Nature* **481**, 525-529.
- 906 **Curtis, M.D., and Grossniklaus, U.** (2003). A gateway cloning vector set for high-throughput  
907 functional analysis of genes in planta. *Plant physiology* **133**, 462-469.
- 908 **De Storme, N., and Geelen, D.** (2014). Callose homeostasis at plasmodesmata: molecular  
909 regulators and developmental relevance. *Frontiers in plant science* **5**, 138.
- 910 **Donohoe, B.S., Kang, B.H., and Staehelin, L.A.** (2007). Identification and characterization  
911 of COPIa- and COPIb-type vesicle classes associated with plant and algal Golgi.  
912 *Proceedings of the National Academy of Sciences of the United States of America* **104**,  
913 163-168.

- 914 **Ellinger, D., Naumann, M., Falter, C., Zwikowics, C., Jamrow, T., Manisseri, C.,**  
915 **Somerville, S.C., and Voigt, C.A.** (2013). Elevated early callose deposition results in  
916 complete penetration resistance to powdery mildew in Arabidopsis. *Plant physiology*  
917 **161**, 1433-1444.
- 918 **Eugster, A., Frigerio, G., Dale, M., and Duden, R.** (2000). COP I domains required for  
919 coatomer integrity, and novel interactions with ARF and ARF-GAP. *The EMBO journal*  
920 **19**, 3905-3917.
- 921 **Eugster, A., Frigerio, G., Dale, M., and Duden, R.** (2004). The alpha- and beta'-COP WD40  
922 domains mediate cargo-selective interactions with distinct di-lysine motifs. *Molecular*  
923 *biology of the cell* **15**, 1011-1023.
- 924 **Fang, L., Ishikawa, T., Rennie, E.A., Murawska, G.M., Lao, J., Yan, J., Tsai, A.Y., Baidoo,**  
925 **E.E., Xu, J., Keasling, J.D., Demura, T., Kawai-Yamada, M., Scheller, H.V., and**  
926 **Mortimer, J.C.** (2016). Loss of Inositol Phosphorylceramide Sphingolipid  
927 Mannosylation Induces Plant Immune Responses and Reduces Cellulose Content in  
928 Arabidopsis. *The Plant cell* **28**, 2991-3004.
- 929 **Farquharson, K.L.** (2015). Sterols Modulate Cell-to-Cell Connectivity at Plasmodesmata. *The*  
930 *Plant cell* **27**, 948.
- 931 **Faulkner, C., Petutschnig, E., Benitez-Alfonso, Y., Beck, M., Robatzek, S., Lipka, V., and**  
932 **Maule, A.J.** (2013). LYM2-dependent chitin perception limits molecular flux via  
933 plasmodesmata. *Proceedings of the National Academy of Sciences of the United States*  
934 *of America* **110**, 9166-9170.
- 935 **Gao, C., Cai, Y., Wang, Y., Kang, B.H., Aniento, F., Robinson, D.G., and Jiang, L.** (2014).  
936 Retention mechanisms for ER and Golgi membrane proteins. *Trends in plant science*  
937 **19**, 508-515.
- 938 **Gaudioso-Pedraza, R., Beck, M., Frances, L., Kirk, P., Ripodas, C., Niebel, A., Oldroyd,**  
939 **G.E.D., Benitez-Alfonso, Y., and de Carvalho-Niebel, F.** (2018). Callose-Regulated  
940 Symplastic Communication Coordinates Symbiotic Root Nodule Development. *Current*  
941 *biology : CB* **28**, 3562-3577 e3566.
- 942 **Gaynor, E.C., Graham, T.R., and Emr, S.D.** (1998). COPI in ER/Golgi and intra-Golgi  
943 transport: do yeast COPI mutants point the way? *Biochimica et biophysica acta* **1404**,  
944 33-51.
- 945 **Gehl, C., Waadt, R., Kudla, J., Mendel, R.R., and Hansch, R.** (2009). New GATEWAY  
946 vectors for high throughput analyses of protein-protein interactions by bimolecular  
947 fluorescence complementation. *Molecular plant* **2**, 1051-1058.
- 948 **Geng, C., Cong, Q.Q., Li, X.D., Mou, A.L., Gao, R., Liu, J.L., and Tian, Y.P.** (2015).  
949 DEVELOPMENTALLY REGULATED PLASMA MEMBRANE PROTEIN of  
950 *Nicotiana benthamiana* contributes to potyvirus movement and transports to  
951 plasmodesmata via the early secretory pathway and the actomyosin system. *Plant*  
952 *physiology* **167**, 394-410.
- 953 **Gimeno-Ferrer, F., Pastor-Cantizano, N., Bernat-Silvestre, C., Selvi-Martinez, P., Vera-**  
954 **Sirera, F., Gao, C., Perez-Amador, M.A., Jiang, L., Aniento, F., and Marcote, M.J.**  
955 (2017). alpha2-COP is involved in early secretory traffic in Arabidopsis and is required  
956 for plant growth. *Journal of experimental botany* **68**, 391-401.
- 957 **Grennan, A.K.** (2007). Lipid rafts in plants. *Plant physiology* **143**, 1083-1085.
- 958 **Grison, M.S., Brocard, L., Fouillen, L., Nicolas, W., Wewer, V., Dormann, P., Nacir, H.,**  
959 **Benitez-Alfonso, Y., Claverol, S., Germain, V., Boutte, Y., Mongrand, S., and**



- 960 **Bayer, E.M.** (2015). Specific membrane lipid composition is important for  
961 plasmodesmata function in Arabidopsis. *The Plant cell* **27**, 1228-1250.
- 962 **Han, X., Hyun, T.K., Zhang, M., Kumar, R., Koh, E.J., Kang, B.H., Lucas, W.J., and Kim,**  
963 **J.Y.** (2014). Auxin-callose-mediated plasmodesmal gating is essential for tropic auxin  
964 gradient formation and signaling. *Developmental cell* **28**, 132-146.
- 965 **Im, S.S., Park, H.Y., Shon, J.C., Chung, I.S., Cho, H.C., Liu, K.H., and Song, D.K.** (2019).  
966 Plasma sphingomyelins increase in pre-diabetic Korean men with abdominal obesity.  
967 *PloS one* **14**, e0213285.
- 968 **Iswanto, A.B., and Kim, J.Y.** (2017). Lipid Raft, Regulator of Plasmodesmal Callose  
969 Homeostasis. *Plants* **6**.
- 970 **Iswanto, A.B.B., Shon, J.C., Liu, K.H., Vu, M.H., Kumar, R., and Kim, J.Y.** (2020).  
971 Sphingolipids Modulate Secretion of Glycosylphosphatidylinositol-Anchored  
972 Plasmodesmata Proteins and Callose Deposition. *Plant physiology* **184**, 407-420.
- 973 **Jackson, L.P.** (2014). Structure and mechanism of COPI vesicle biogenesis. *Current opinion*  
974 *in cell biology* **29**, 67-73.
- 975 **Jackson, L.P., Lewis, M., Kent, H.M., Edeling, M.A., Evans, P.R., Duden, R., and Owen,**  
976 **D.J.** (2012). Molecular basis for recognition of dilysine trafficking motifs by COPI.  
977 *Developmental cell* **23**, 1255-1262.
- 978 **Jacobs, A.K., Lipka, V., Burton, R.A., Panstruga, R., Strizhov, N., Schulze-Lefert, P., and**  
979 **Fincher, G.B.** (2003). An Arabidopsis Callose Synthase, *GSL5*, Is Required for Wound  
980 and Papillary Callose Formation. *The Plant cell* **15**, 2503-2513.
- 981 **Karimi, M., Inzé, D., and Depicker, A.** (2002). GATEWAY™ vectors for Agrobacterium-  
982 mediated plant transformation. *Trends in plant science* **7**, 193-195.
- 983 **Kim, K.H., Kim, E.K., Kim, S.J., Park, Y.H., and Park, H.M.** (2011). Effect of  
984 *Saccharomyces cerevisiae* *ret1-1* mutation on glycosylation and localization of the  
985 secretome. *Molecules and cells* **31**, 151-158.
- 986 **Kumar, R., Wu, S.W., Iswanto, A.B., Kumar, D., Han, X., and Kim, J.Y.** (2016). A Strategy  
987 to Validate the Role of Callose-mediated Plasmodesmal Gating in the Tropic Response.  
988 *Journal of visualized experiments : JoVE*.
- 989 **Lee, J.W., Mok, H.J., Lee, D.Y., Park, S.C., Kim, G.S., Lee, S.E., Lee, Y.S., Kim, K.P., and**  
990 **Kim, H.D.** (2017). UPLC-QqQ/MS-Based Lipidomics Approach To Characterize Lipid  
991 Alterations in Inflammatory Macrophages. *Journal of proteome research* **16**, 1460-1469.
- 992 **Lee, J.Y., and Lu, H.** (2011). Plasmodesmata: the battleground against intruders. *Trends in*  
993 *plant science* **16**, 201-210.
- 994 **Levy, A., Erlanger, M., Rosenthal, M., and Epel, B.L.** (2007). A plasmodesmata-associated  
995 beta-1,3-glucanase in Arabidopsis. *The Plant journal : for cell and molecular biology*  
996 **49**, 669-682.
- 997 **Ma, W., and Goldberg, J.** (2013). Rules for the recognition of dilysine retrieval motifs by  
998 coatmer. *The EMBO journal* **32**, 926-937.
- 999 **Magnin-Robert, M., Le Bourse, D., Markham, J., Dorey, S., Clement, C., Baillieul, F., and**  
1000 **Dhondt-Cordelier, S.** (2015). Modifications of Sphingolipid Content Affect Tolerance  
1001 to Hemibiotrophic and Necrotrophic Pathogens by Modulating Plant Defense  
1002 Responses in Arabidopsis. *Plant physiology* **169**, 2255-2274.
- 1003 **Markham, J.E., and Jaworski, J.G.** (2007). Rapid measurement of sphingolipids from  
1004 *Arabidopsis thaliana* by reversed-phase high-performance liquid chromatography

- 1005 coupled to electrospray ionization tandem mass spectrometry. Rapid communications  
1006 in mass spectrometry : RCM **21**, 1304-1314.
- 1007 **Markham, J.E., Li, J., Cahoon, E.B., and Jaworski, J.G.** (2006). Separation and  
1008 identification of major plant sphingolipid classes from leaves. The Journal of biological  
1009 chemistry **281**, 22684-22694.
- 1010 **Maule, A.J.** (2008). Plasmodesmata: structure, function and biogenesis. Current opinion in  
1011 plant biology **11**, 680-686.
- 1012 **Melser, S., Batailler, B., Peypelut, M., Poujol, C., Bellec, Y., Wattelet-Boyer, V., Maneta-  
1013 Peyret, L., Faure, J.D., and Moreau, P.** (2010). Glucosylceramide biosynthesis is  
1014 involved in Golgi morphology and protein secretion in plant cells. Traffic **11**, 479-490.
- 1015 **Misselwitz, B., Dilling, S., Vonaesch, P., Sacher, R., Snijder, B., Schlumberger, M., Rout,  
1016 S., Stark, M., von Mering, C., Pelkmans, L., and Hardt, W.D.** (2011). RNAi screen  
1017 of Salmonella invasion shows role of COPI in membrane targeting of cholesterol and  
1018 Cdc42. Molecular systems biology **7**, 474.
- 1019 **Mongrand, S., Stanislas, T., Bayer, E.M., Lherminier, J., and Simon-Plas, F.** (2010).  
1020 Membrane rafts in plant cells. Trends in plant science **15**, 656-663.
- 1021 **Mongrand, S., Morel, J., Laroche, J., Claverol, S., Carde, J.P., Hartmann, M.A., Bonneu,  
1022 M., Simon-Plas, F., Lessire, R., and Bessoule, J.J.** (2004). Lipid rafts in higher plant  
1023 cells: purification and characterization of Triton X-100-insoluble microdomains from  
1024 tobacco plasma membrane. The Journal of biological chemistry **279**, 36277-36286.
- 1025 **Msanne, J., Chen, M., Luttgeharm, K.D., Bradley, A.M., Mays, E.S., Paper, J.M., Boyle,  
1026 D.L., Cahoon, R.E., Schrick, K., and Cahoon, E.B.** (2015). Glucosylceramides are  
1027 critical for cell-type differentiation and organogenesis, but not for cell viability in  
1028 Arabidopsis. The Plant journal : for cell and molecular biology **84**, 188-201.
- 1029 **Nicolas, W.J., Grison, M.S., and Bayer, E.M.** (2017). Shaping intercellular channels of  
1030 plasmodesmata: the structure-to-function missing link. Journal of experimental botany  
1031 **69**, 91-103.
- 1032 **Nishimura, M.T., Stein, M., Hou, B.H., Vogel, J.P., Edwards, H., and Somerville, S.C.**  
1033 (2003). Loss of a callose synthase results in salicylic acid-dependent disease resistance.  
1034 Science **301**, 969-972.
- 1035 **Orci, L., Stamnes, M., Ravazzola, M., Amherdt, M., Perrelet, A., Sollner, T.H., and  
1036 Rothman, J.E.** (1997). Bidirectional transport by distinct populations of COPI-coated  
1037 vesicles. Cell **90**, 335-349.
- 1038 **Paul, M.J., and Frigerio, L.** (2007). Coated vesicles in plant cells. Seminars in cell &  
1039 developmental biology **18**, 471-478.
- 1040 **Pepperkok, R., Scheel, J., Horstmann, H., Hauri, H.P., Griffiths, G., and Kreis, T.E.**  
1041 (1993). Beta-COP is essential for biosynthetic membrane transport from the  
1042 endoplasmic reticulum to the Golgi complex in vivo. Cell **74**, 71-82.
- 1043 **Rothman, J.E.** (1994). Mechanisms of intracellular protein transport. Nature **372**, 55-63.
- 1044 **Schroder-Kohne, S., Letourneur, F., and Riezman, H.** (1998). Alpha-COP can discriminate  
1045 between distinct, functional di-lysine signals in vitro and regulates access into  
1046 retrograde transport. Journal of cell science **111 ( Pt 23)**, 3459-3470.
- 1047 **Spang, A.** (2013). Traffic COPs: rules of detection. The EMBO journal **32**, 915-916.
- 1048 **Sutterlin, C., Doering, T.L., Schimmoller, F., Schroder, S., and Riezman, H.** (1997).  
1049 Specific requirements for the ER to Golgi transport of GPI-anchored proteins in yeast.  
1050 Journal of cell science **110 ( Pt 21)**, 2703-2714.

- 1051 **Tapken, W., and Murphy, A.S.** (2015). Membrane nanodomains in plants: capturing form,  
1052 function, and movement. *Journal of experimental botany* **66**, 1573-1586.
- 1053 **Tellier, F., Maia-Grondard, A., Schmitz-Afonso, I., and Faure, J.D.** (2014). Comparative  
1054 plant sphingolipidomic reveals specific lipids in seeds and oil. *Phytochemistry* **103**, 50-  
1055 58.
- 1056 **Thomas, C.L., Bayer, E.M., Ritzenthaler, C., Fernandez-Calvino, L., and Maule, A.J.**  
1057 (2008). Specific targeting of a plasmodesmal protein affecting cell-to-cell  
1058 communication. *PLoS biology* **6**, e7.
- 1059 **Vaten, A., Dettmer, J., Wu, S., Stierhof, Y.D., Miyashima, S., Yadav, S.R., Roberts, C.J.,**  
1060 **Campilho, A., Bulone, V., Lichtenberger, R., Lehesranta, S., Mahonen, A.P., Kim,**  
1061 **J.Y., Jokitalo, E., Sauer, N., Scheres, B., Nakajima, K., Carlsbecker, A., Gallagher,**  
1062 **K.L., and Helariutta, Y.** (2011). Callose biosynthesis regulates symplastic trafficking  
1063 during root development. *Developmental cell* **21**, 1144-1155.
- 1064 **Verma, D.P., and Hong, Z.** (2001). Plant callose synthase complexes. *Plant molecular biology*  
1065 **47**, 693-701.
- 1066 **Vu, M.H., Iswanto, A.B.B., Lee, J., and Kim, J.Y.** (2020). The Role of Plasmodesmata-  
1067 Associated Receptor in Plant Development and Environmental Response. *Plants* **9**.
- 1068 **Wang, W., Yang, X., Tangchaiburana, S., Ndeh, R., Markham, J.E., Tsegaye, Y., Dunn,**  
1069 **T.M., Wang, G.L., Bellizzi, M., Parsons, J.F., Morrissey, D., Bravo, J.E., Lynch,**  
1070 **D.V., and Xiao, S.** (2008). An inositolphosphorylceramide synthase is involved in  
1071 regulation of plant programmed cell death associated with defense in Arabidopsis. *The*  
1072 *Plant cell* **20**, 3163-3179.
- 1073 **Wang, Y.N., Wang, H., Yamaguchi, H., Lee, H.J., Lee, H.H., and Hung, M.C.** (2010).  
1074 COPI-mediated retrograde trafficking from the Golgi to the ER regulates EGFR nuclear  
1075 transport. *Biochemical and biophysical research communications* **399**, 498-504.
- 1076 **Woo, C.H., Gao, C., Yu, P., Tu, L., Meng, Z., Banfield, D.K., Yao, X., and Jiang, L.** (2015).  
1077 Conserved function of the lysine-based KXD/E motif in Golgi retention for  
1078 endomembrane proteins among different organisms. *Molecular biology of the cell* **26**,  
1079 4280-4293.
- 1080 **Wu, S.W., Kumar, R., Iswanto, A.B.B., and Kim, J.Y.** (2018). Callose balancing at  
1081 plasmodesmata. *Journal of experimental botany* **69**, 5325-5339.
- 1082 **Xia, Y.Q., and Jemal, M.** (2009). Phospholipids in liquid chromatography/mass spectrometry  
1083 bioanalysis: comparison of three tandem mass spectrometric techniques for monitoring  
1084 plasma phospholipids, the effect of mobile phase composition on phospholipids elution  
1085 and the association of phospholipids with matrix effects. *Rapid communications in mass*  
1086 *spectrometry : RCM* **23**, 2125-2138.
- 1087 **Xie, L.J., Chen, Q.F., Chen, M.X., Yu, L.J., Huang, L., Chen, L., Wang, F.Z., Xia, F.N.,**  
1088 **Zhu, T.R., Wu, J.X., Yin, J., Liao, B., Shi, J., Zhang, J.H., Aharoni, A., Yao, N.,**  
1089 **Shu, W., and Xiao, S.** (2015). Unsaturation of very-long-chain ceramides protects plant  
1090 from hypoxia-induced damages by modulating ethylene signaling in Arabidopsis. *PLoS*  
1091 *genetics* **11**, e1005143.
- 1092 **Yan, D., Yadav, S.R., Paterlini, A., Nicolas, W.J., Petit, J.D., Brocard, L., Belevich, I.,**  
1093 **Grison, M.S., Vaten, A., Karami, L., El-Showk, S., Lee, J.Y., Murawska, G.M.,**  
1094 **Mortimer, J., Knoblauch, M., Jokitalo, E., Markham, J.E., Bayer, E.M., and**  
1095 **Helariutta, Y.** (2019). Sphingolipid biosynthesis modulates plasmodesmal  
1096 ultrastructure and phloem unloading. *Nature plants* **5**, 604-615.

- 1097 **Yeats, T.H., Bacic, A., and Johnson, K.L.** (2018). Plant glycosylphosphatidylinositol  
1098 anchored proteins at the plasma membrane-cell wall nexus. *Journal of integrative plant*  
1099 *biology* **60**, 649-669.
- 1100 **Zambryski, P., and Crawford, K.** (2000). Plasmodesmata: gatekeepers for cell-to-cell  
1101 transport of developmental signals in plants. *Annual review of cell and developmental*  
1102 *biology* **16**, 393-421.
- 1103 **Zavaliev, R., Dong, X., and Epel, B.L.** (2016). Glycosylphosphatidylinositol (GPI)  
1104 Modification Serves as a Primary Plasmodesmal Sorting Signal. *Plant Physiol* **172**,  
1105 1061-1073.
- 1106 **Zavaliev, R., Ueki, S., Epel, B.L., and Citovsky, V.** (2011). Biology of callose (beta-1,3-  
1107 glucan) turnover at plasmodesmata. *Protoplasma* **248**, 117-130.
- 1108 **Zavaliev, R., Levy, A., Gera, A., and Epel, B.L.** (2013). Subcellular dynamics and role of  
1109 *Arabidopsis* beta-1,3-glucanases in cell-to-cell movement of tobamoviruses. *Molecular*  
1110 *plant-microbe interactions : MPMI* **26**, 1016-1030.
- 1111 **Zhang, X., Henriques, R., Lin, S.S., Niu, Q.W., and Chua, N.H.** (2006). *Agrobacterium*-  
1112 mediated transformation of *Arabidopsis thaliana* using the floral dip method. *Nature*  
1113 *protocols* **1**, 641-646.
- 1114
- 1115
- 1116
- 1117

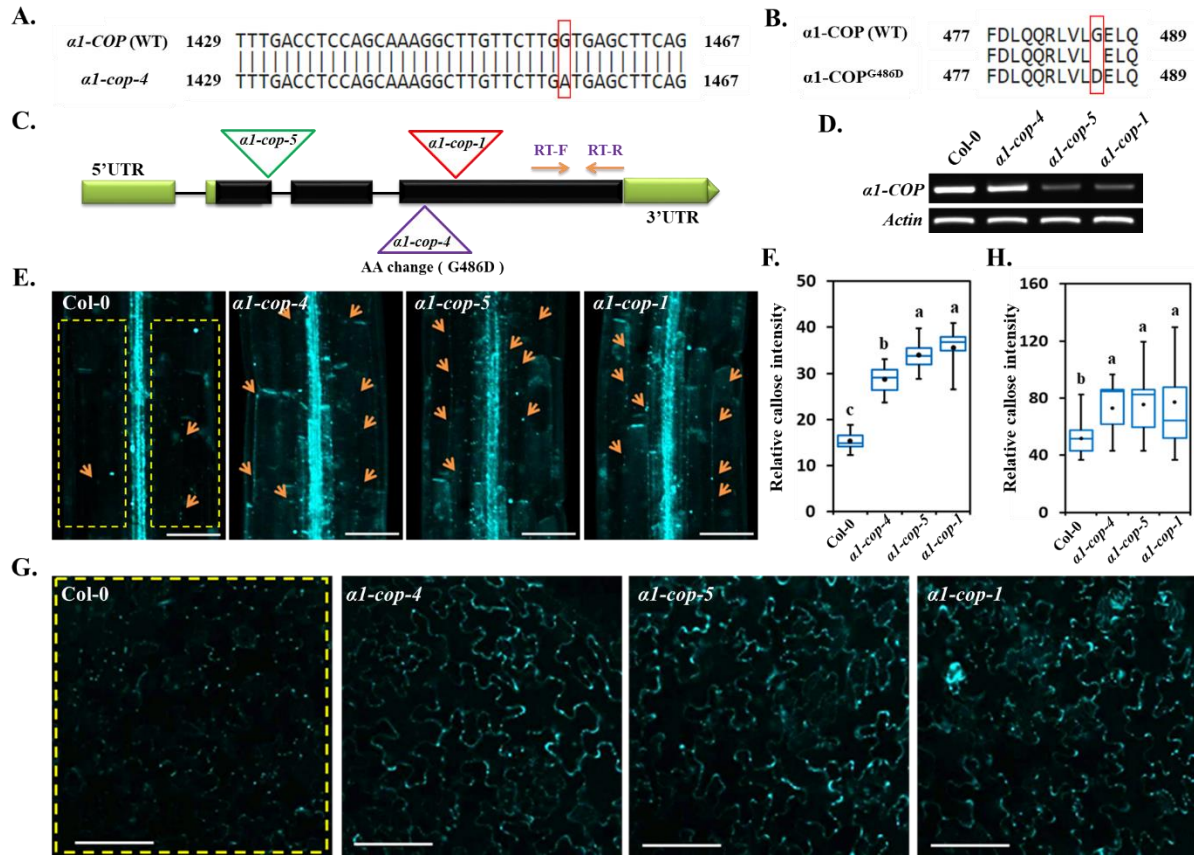

1118

1119

1120

**Figure 1. Callose accumulation is increased in the *α1-cop* mutants.**

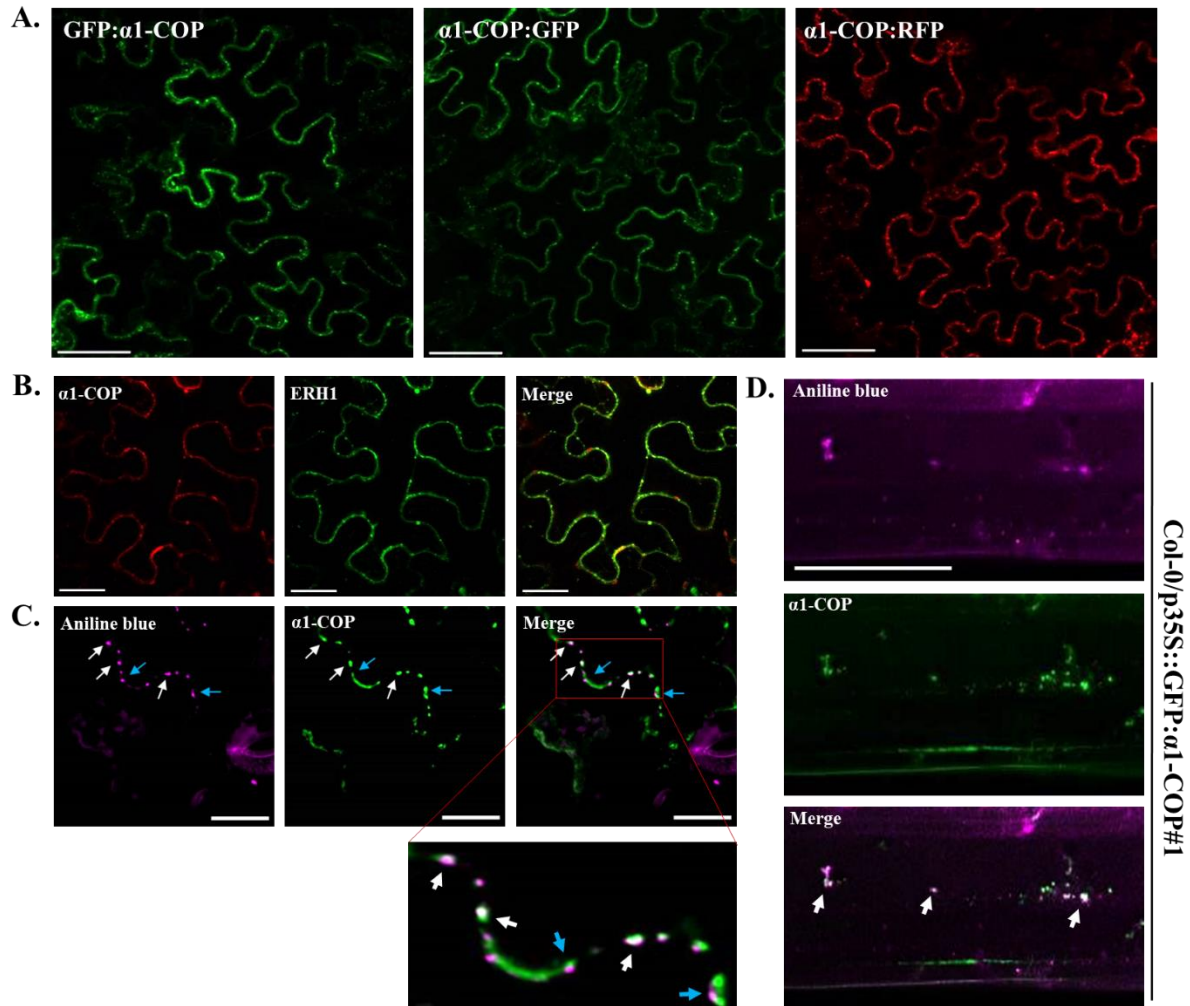

1121  
1122  
1123  
1124  
1125

**Figure 2.  $\alpha$ 1-COP is located at *trans*-Golgi compartment and partially localized at PD.**

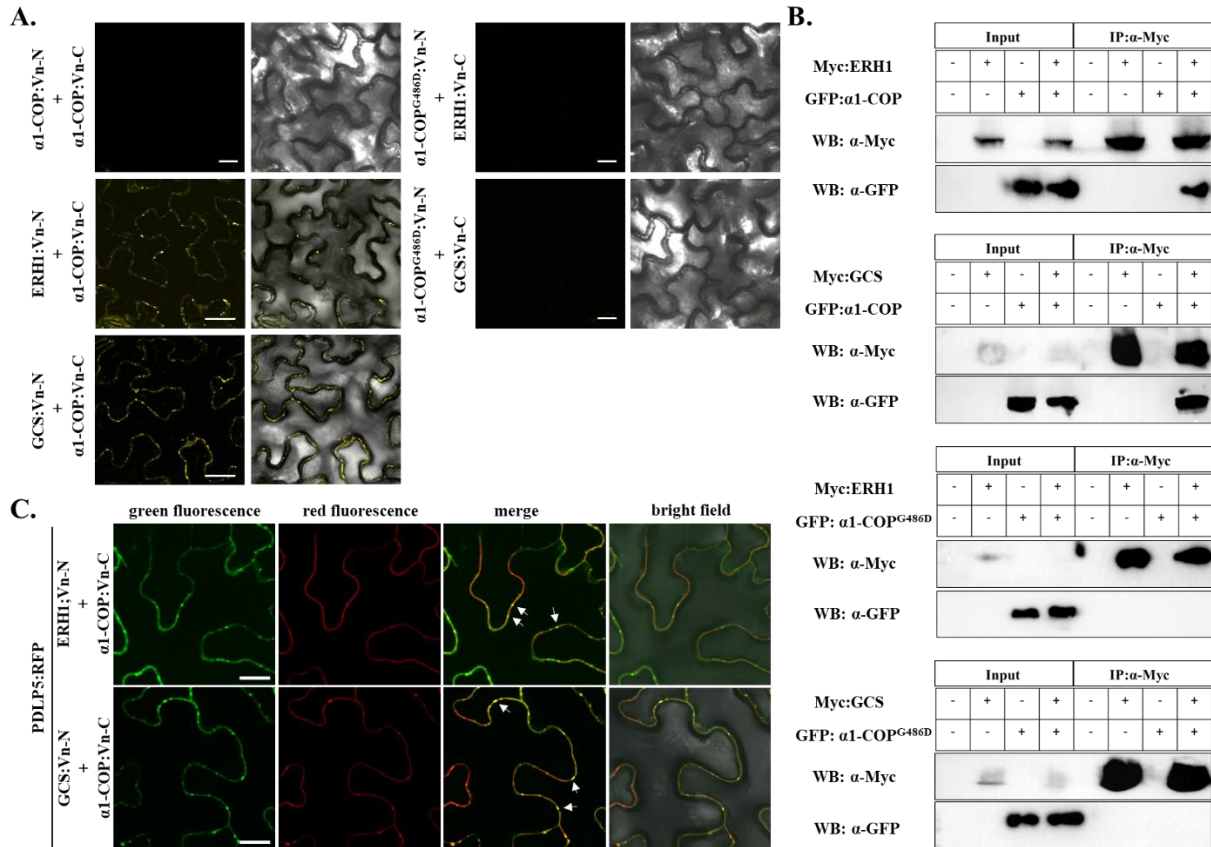

1126

1127

1128

1129

**Figure 3.  $\alpha$ 1-COP interacts with ERH1 and GCS.**

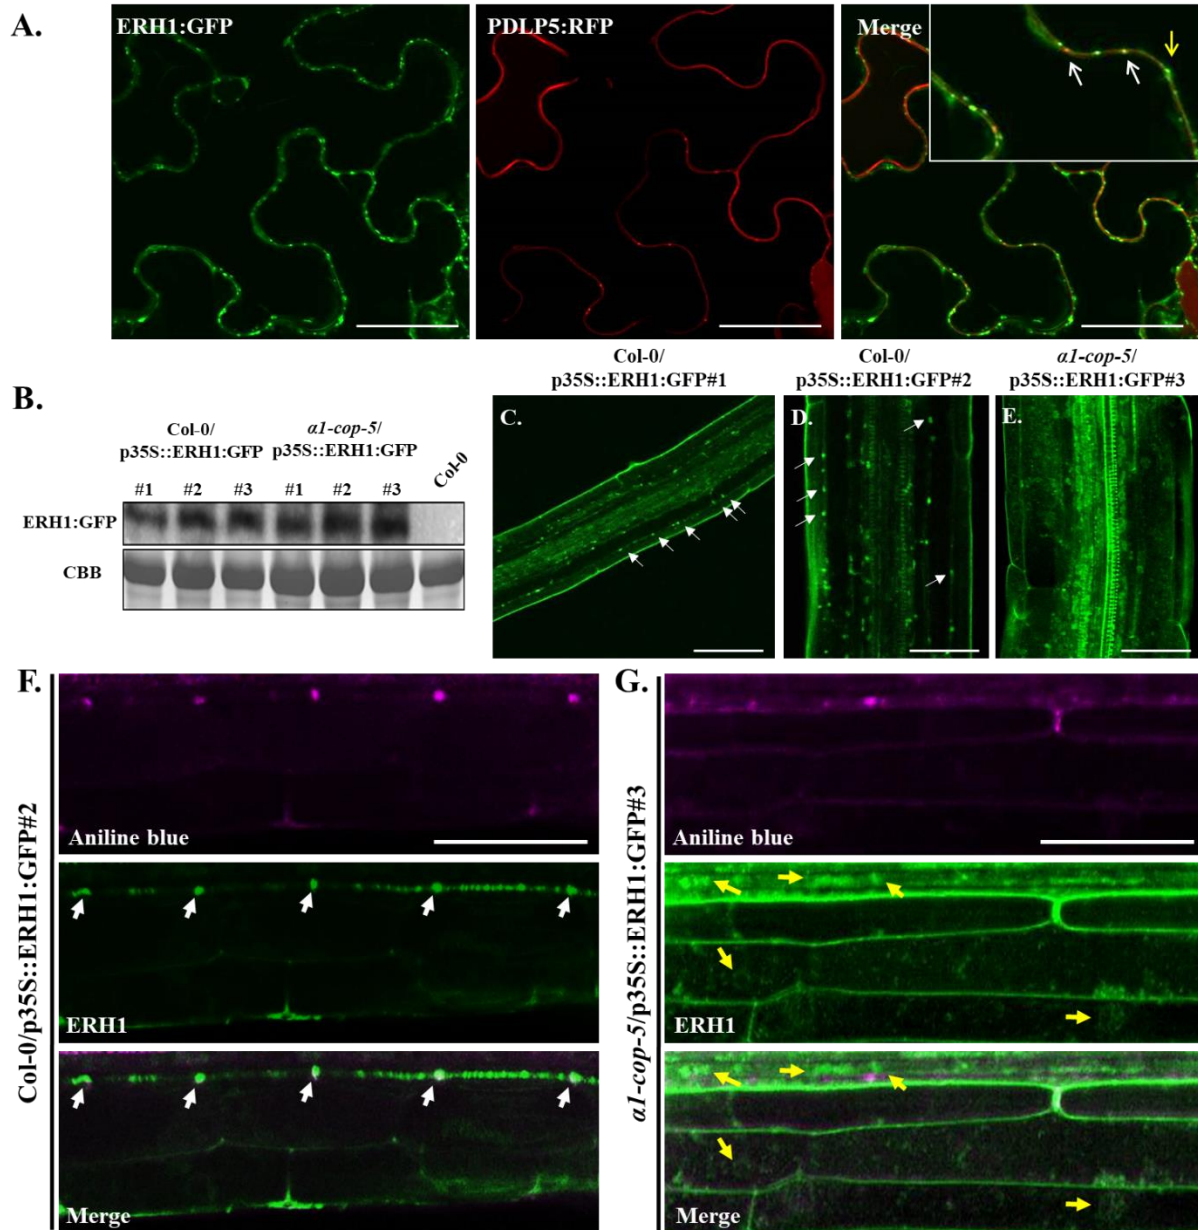

1130

1131

1132

**Figure 4. Plasmodesmata localization of ERH1 is altered in the *a1-cop-5* mutant.**



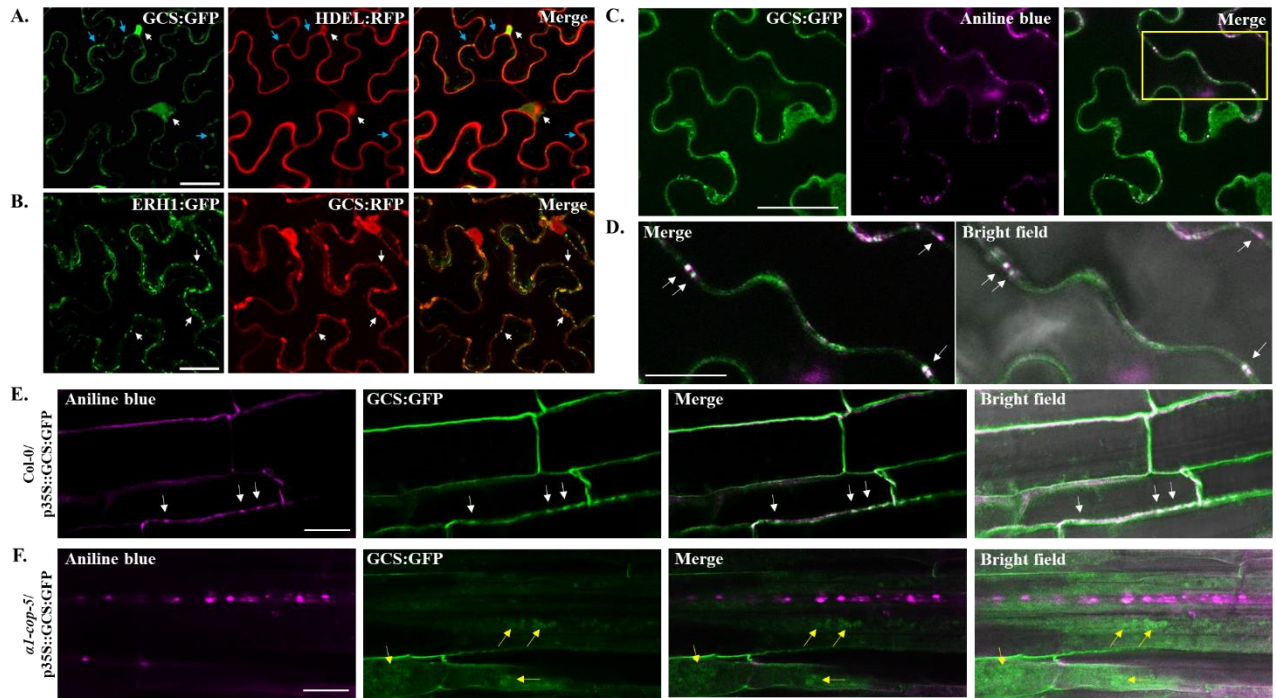

1133

1134

1135 **Figure 5. Subcellular localization of GCS is altered in the *al-cop-5* mutant.**

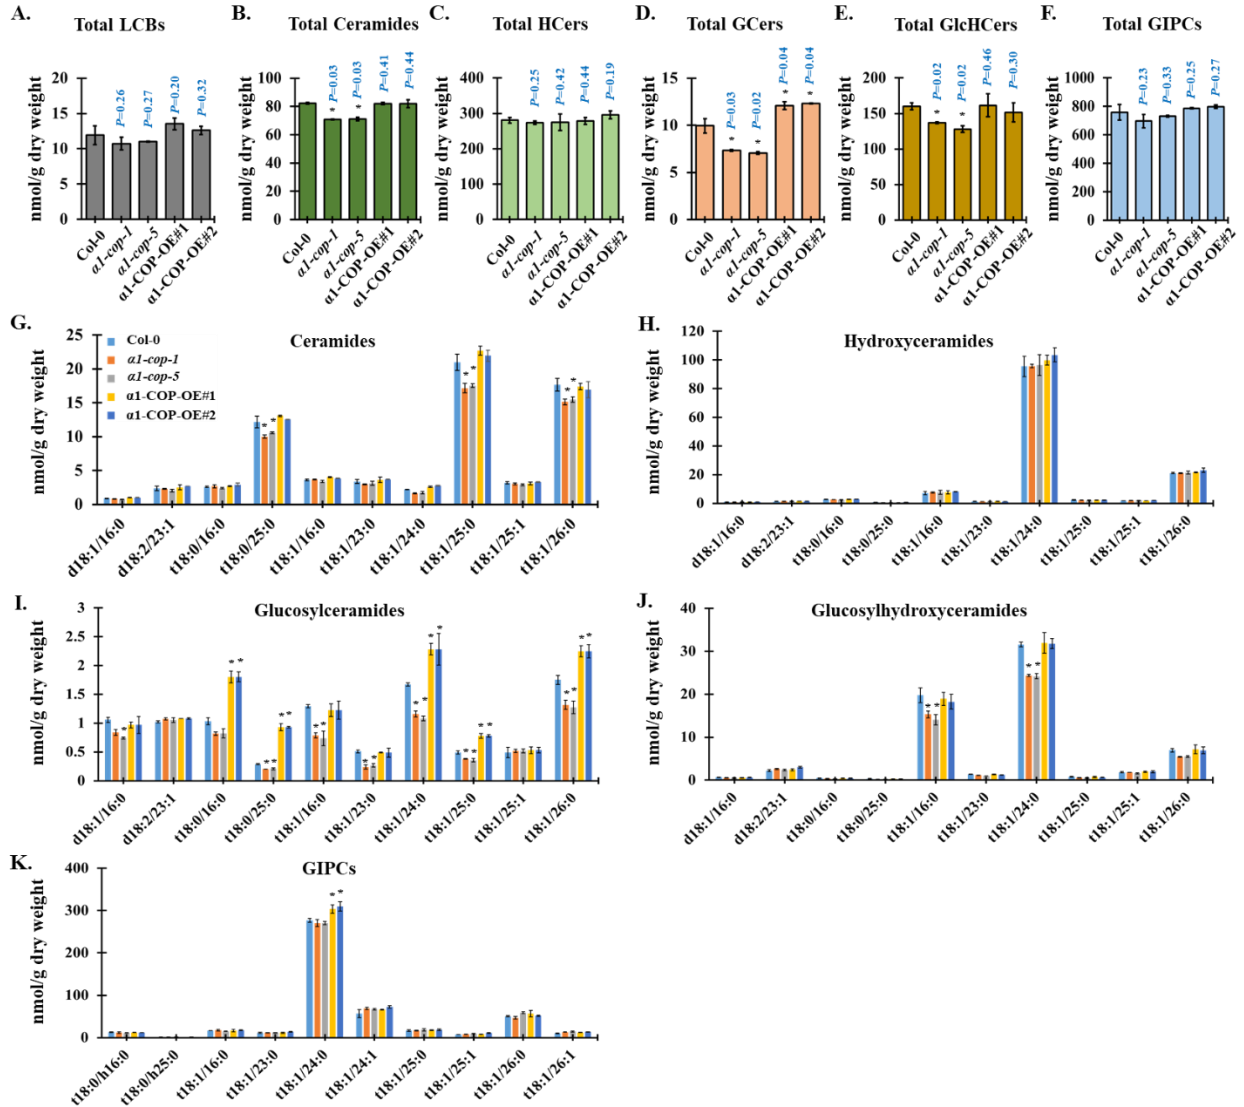

1136  
1137  
1138  
1139

**Figure 6. Loss-of-function of *a1-COP* reduces ceramides, GlcCers and GlcHCers.**

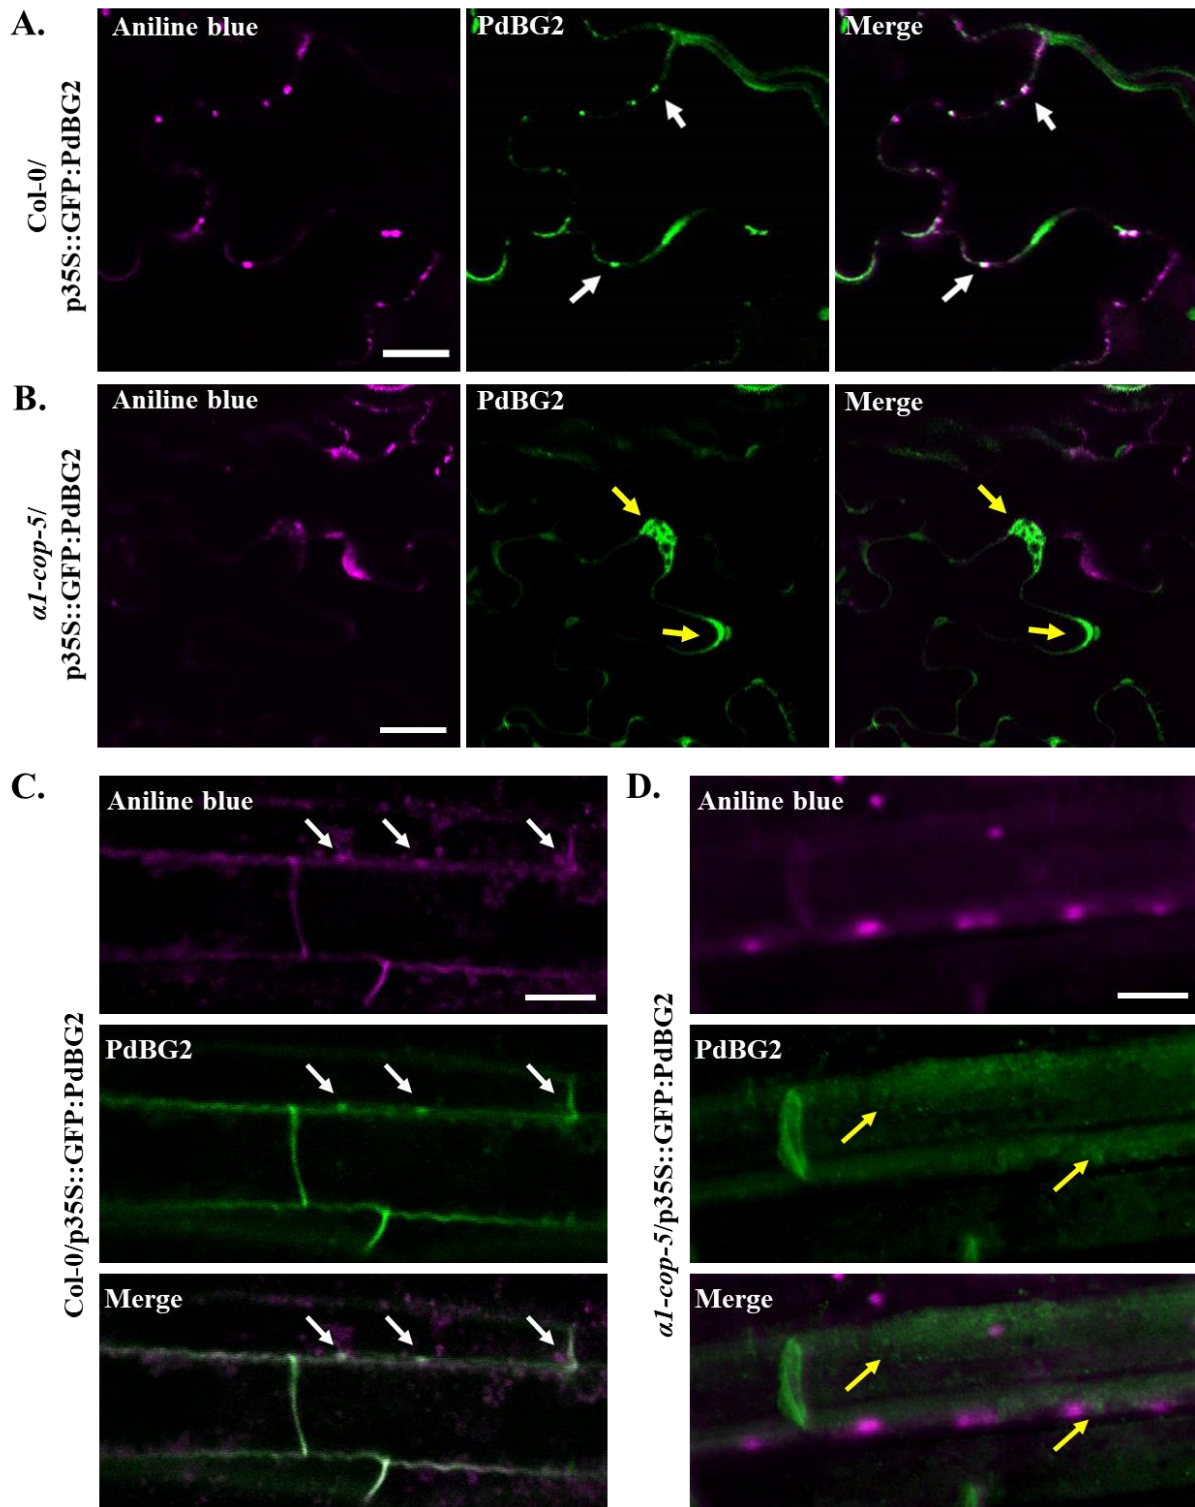

1140

1141

1142

**Figure 7. Subcellular localization of PdBG2 protein is altered in the *α1-cop-5* mutant.**

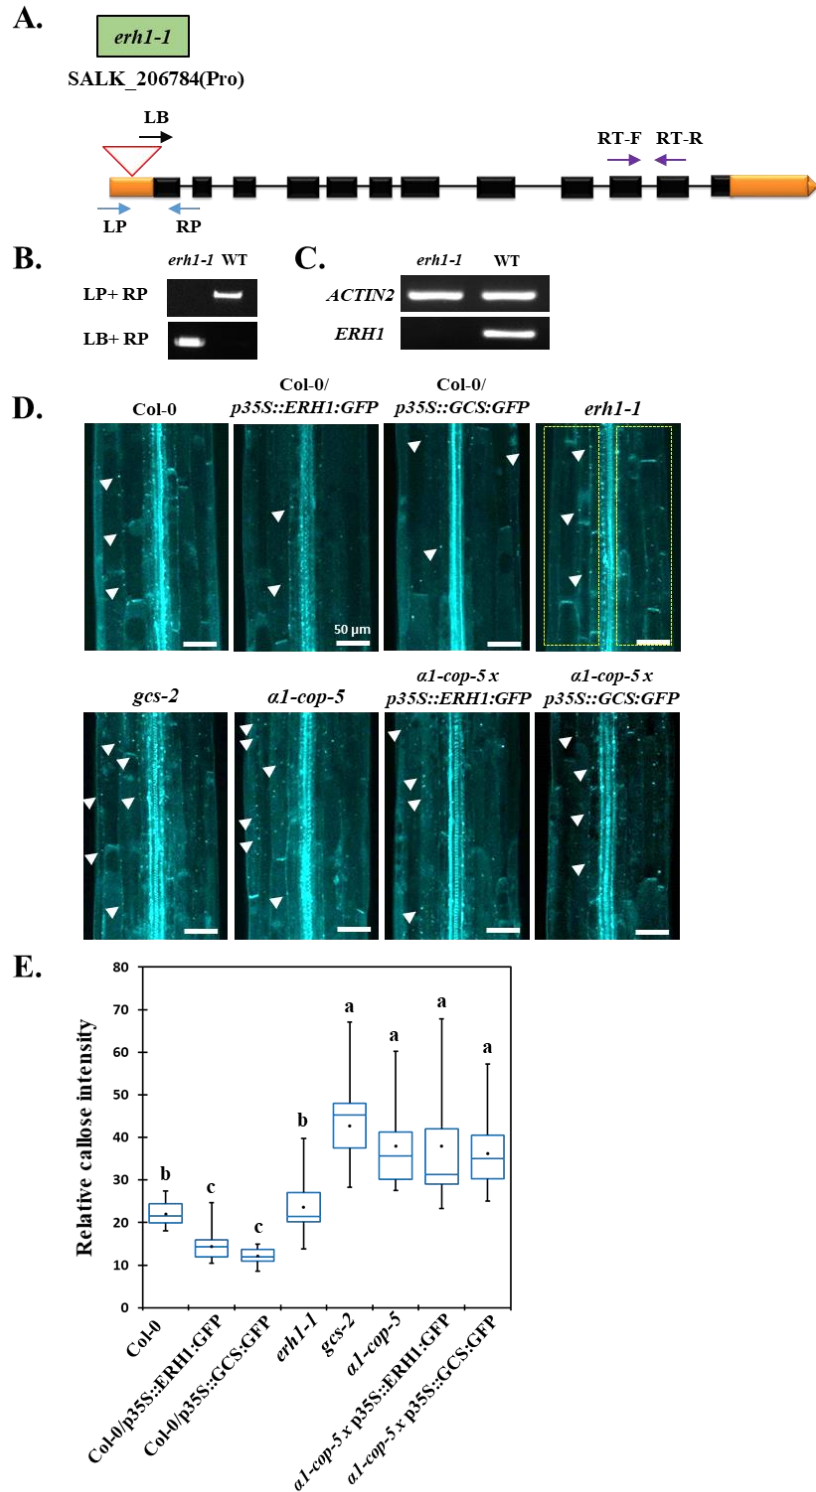

1143

1144

1145 **Figure 8. Excess callose accumulation is maintained in the *a1-cop-5* overexpressing *ERH***

1146 ***1* or *GCS* plants.**

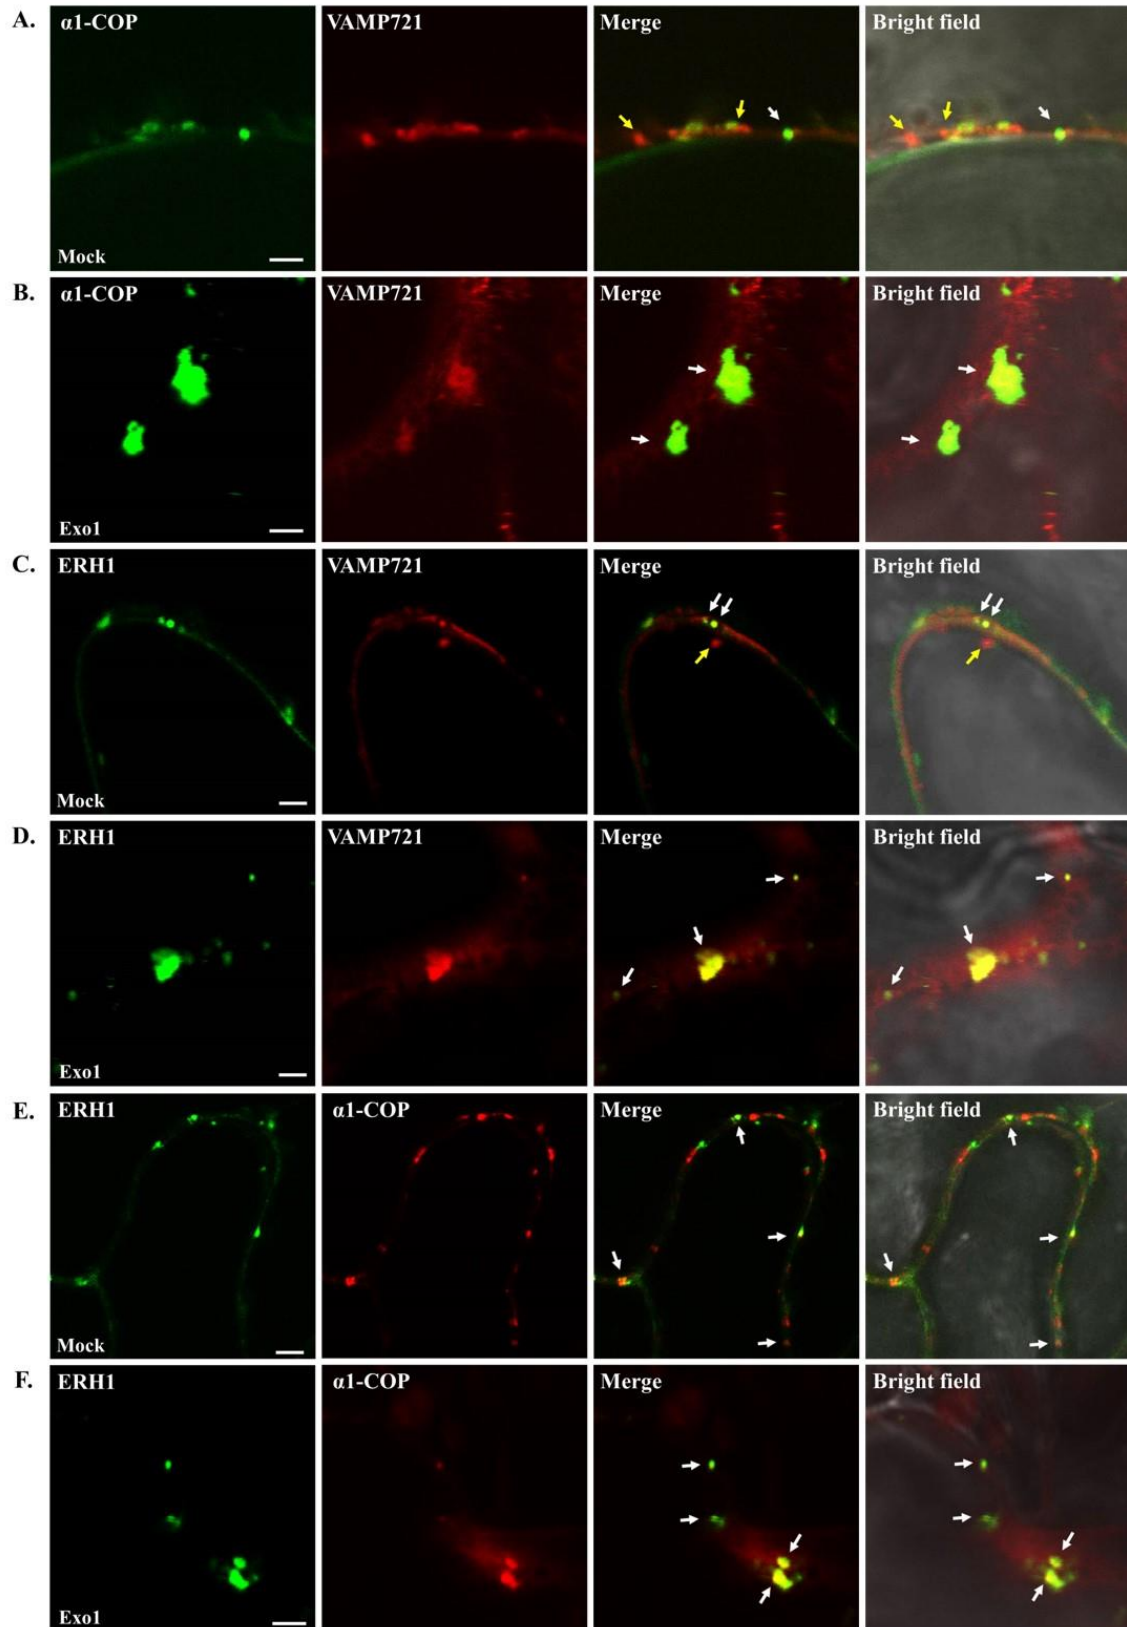

1147  
1148  
1149

**Figure 9. Subcellular localization of  $\alpha 1$ -COP and ERH1 in the presence of Exo1.**

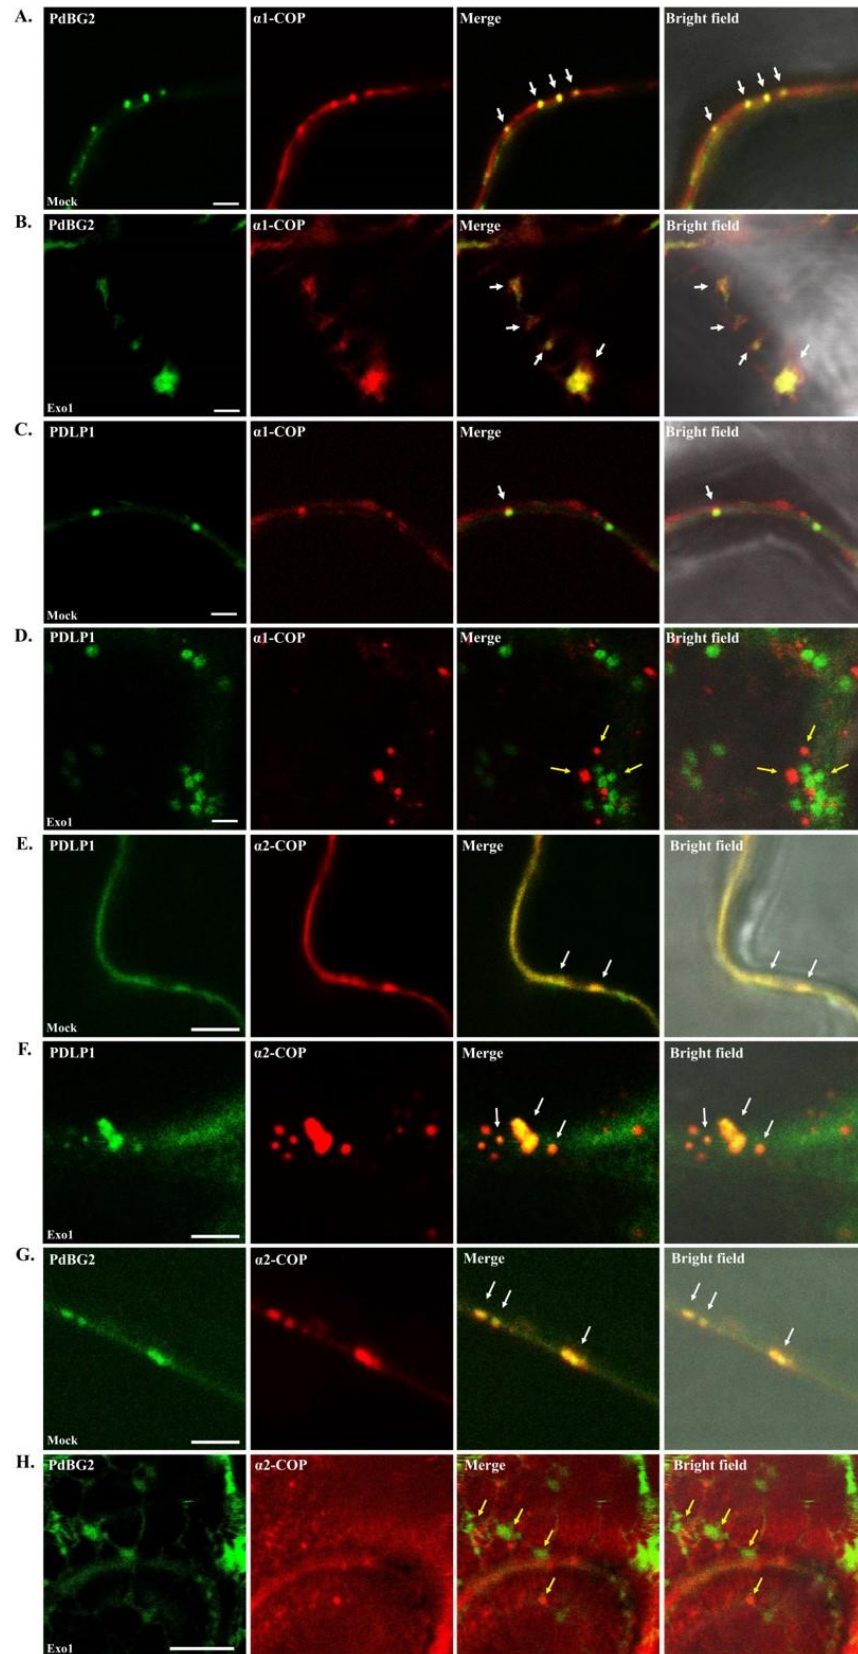

1150  
1151

**Figure 10. PdBG2 and  $\alpha$ 1-COP are retained in the same cellular compartment.**

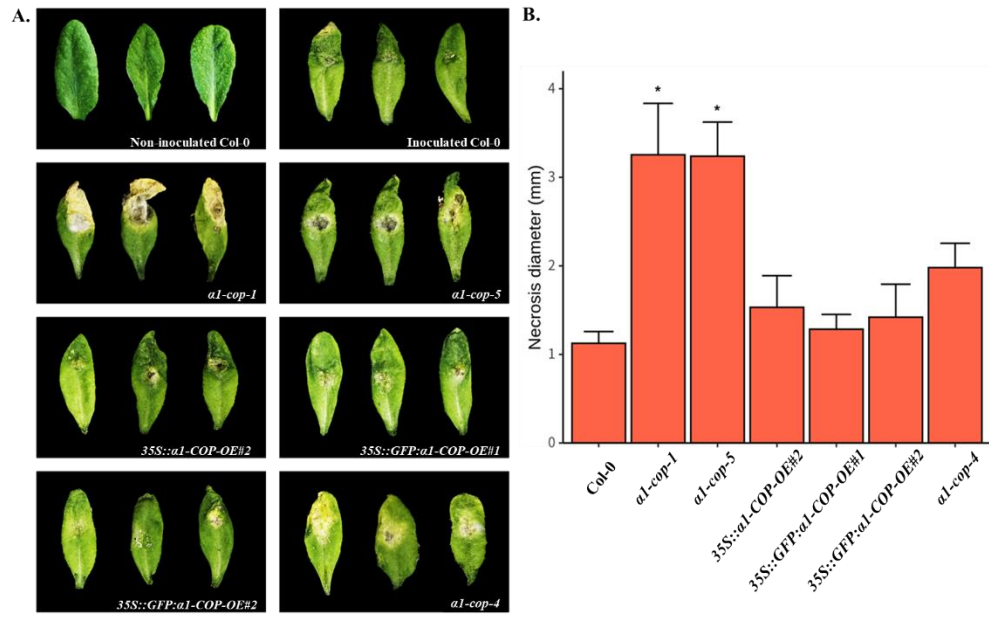

1152  
1153  
1154  
1155  
1156  
1157

**Figure 11. Susceptibility analysis of *a1-cop* mutants against to *Botrytis cinerea*.**

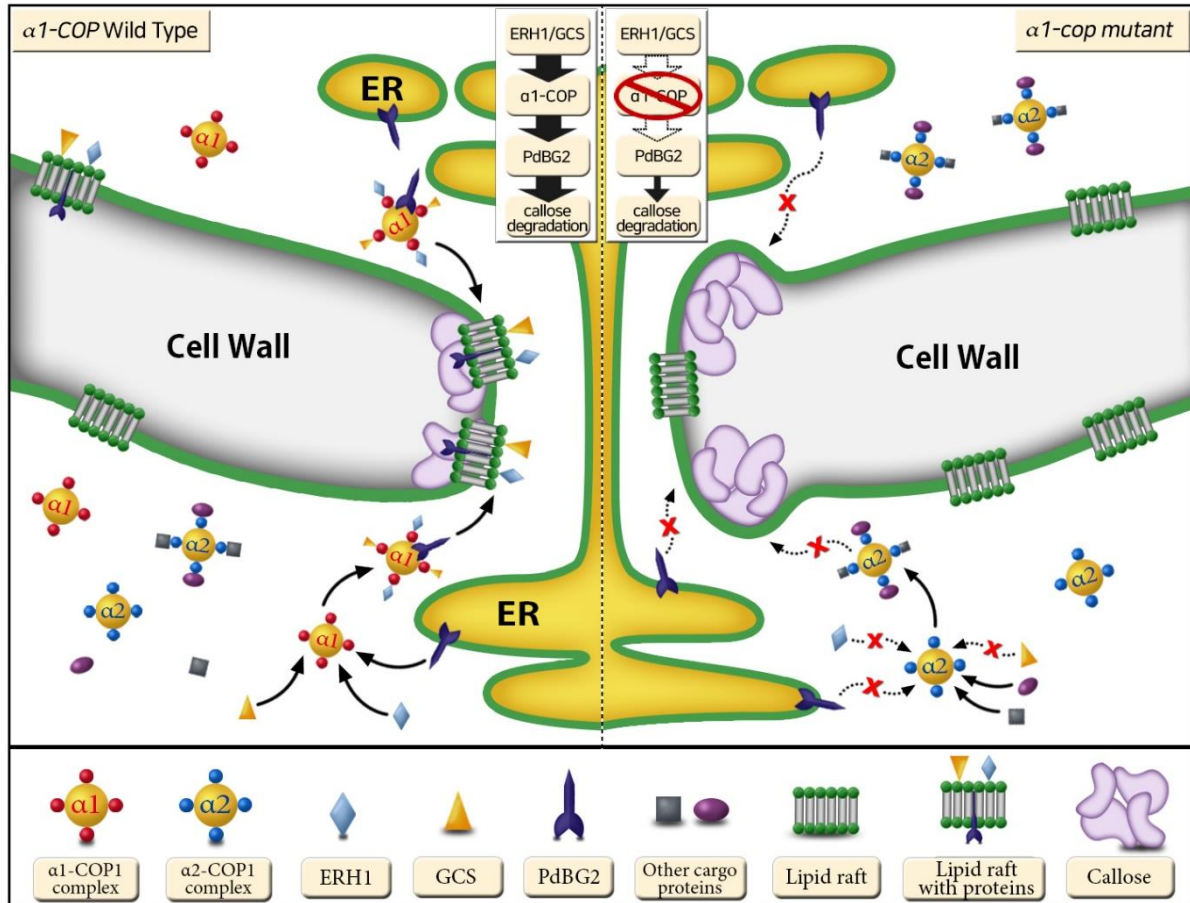

1158

1159 **Figure 12. Schematic model of the role of  $\alpha 1$ -COP in the regulation of the PD.**
